# Supplementary material for: Regiospecific Synthesis of Ring A Fused Withaferin A Isoxazoline Analogues: Induction of Premature Senescence by W-2b in Proliferating Cancer Cells
Source: PubMed Central journal article supplement (PMC5653814; doi:10.1038/s41598-017-13664-x), 2017-10-23

## Supporting Information

### **Regiospecific Synthesis of Ring A Fused Withaferin A Isoxazoline Analogues: Induction of Premature Senescence by W-2b in Proliferating Cancer Cells**

Faheem Rasool,<sup>1,2,#</sup> Debasis Nayak,<sup>1,3,#</sup> Archana Katoch,<sup>1,3</sup> Mir Mohd Faheem,<sup>1,3</sup> Syed Khalid Yousuf,<sup>1,4</sup> Nazar Hussain,<sup>1,2</sup> Chetan Belawal,<sup>5</sup> N. K. Satti,<sup>5</sup> Anindya Goswami,<sup>1,3,\*</sup> Debaraj Mukherjee<sup>1,2,\*</sup>

<sup>1</sup>Academy of Scientific and Innovative Research (AcSIR), New Delhi, India.

<sup>2</sup>Natural Product Chemistry-Microbes, CSIR-Indian Institute of Integrative Medicine, Jammu-180001, India.

<sup>3</sup>Cancer Pharmacology Division, CSIR-Indian Institute of Integrative Medicine, Jammu-180001, India.

<sup>4</sup>Medicinal Chemistry Division, CSIR-Indian Institute of Integrative Medicine, Srinagar-190005, India.

<sup>5</sup>Natural Product Chemistry-Plants, CSIR-Indian Institute of Integrative Medicine, Jammu-180001, India.

#### **Table of Contents:**

| <b>Sl. No.</b> | <b>Contents</b>                                   | <b>Page No.</b> |
|----------------|---------------------------------------------------|-----------------|
| 1              | Supporting figures                                | S2-S3           |
| 2              | HPLC of W-2b                                      | S4              |
| 3              | HRMS OF W-2b                                      | S5              |
| 4              | Copies of <sup>1</sup> H NMR, <sup>13</sup> C NMR | S6-S43          |
| 5              | 2D NMR                                            | S44-S51         |

## 1. Supplementary figures

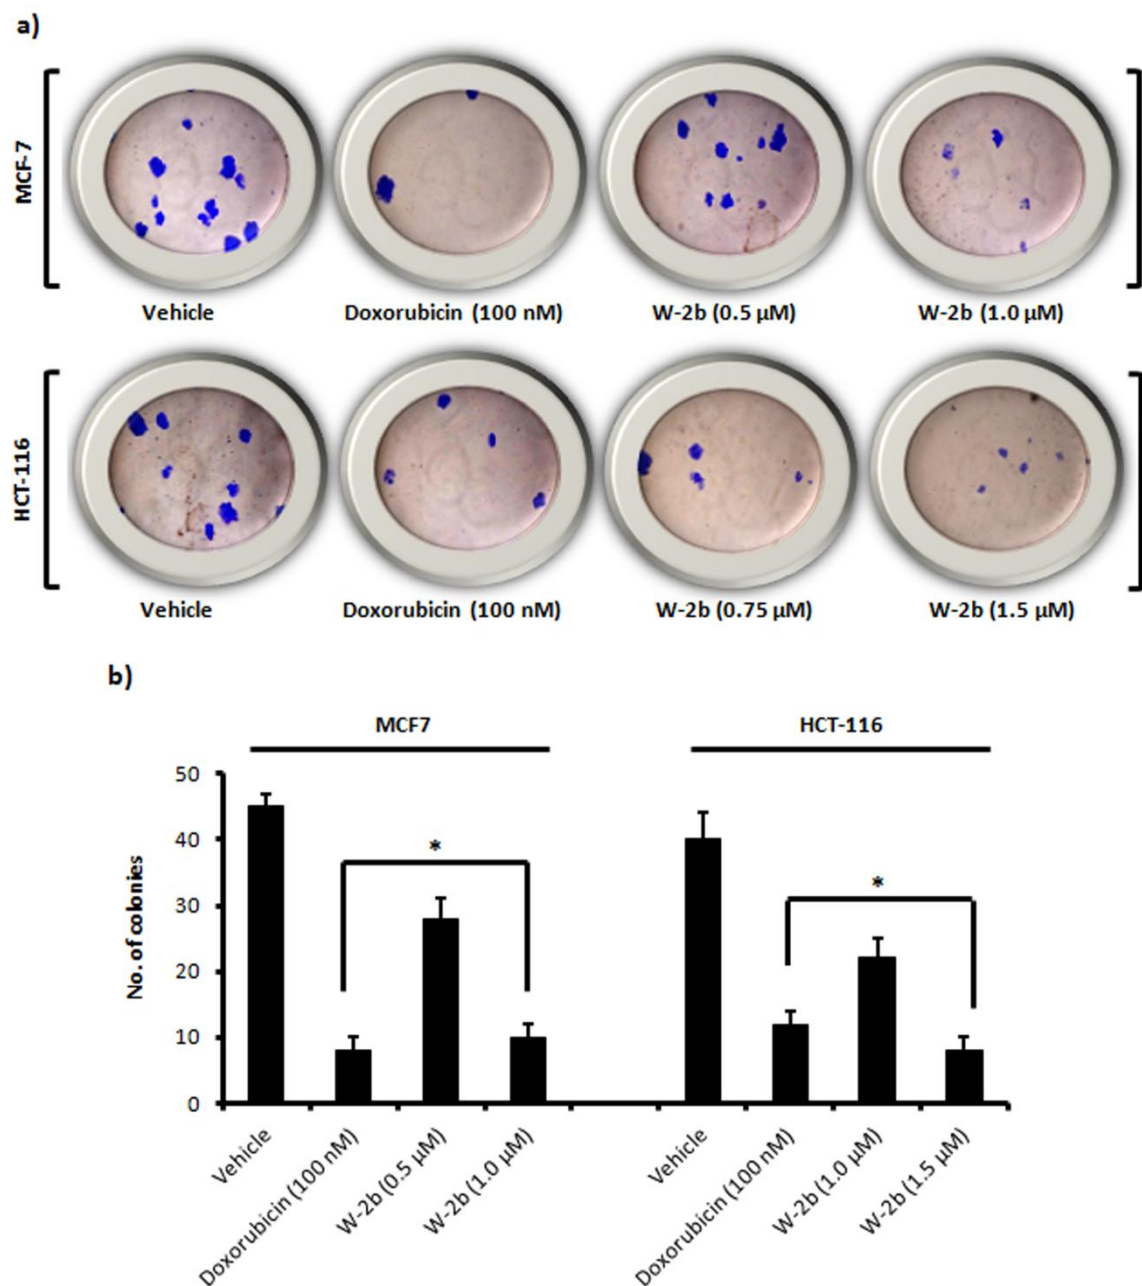

**Supplementary Figure S1. W-2b inhibits cell proliferation.** (a) Effect of vehicle, doxorubicin and increasing concentrations of **W-2b** on colony formation ability of MCF7 and HCT-116 cells. Original magnification 20x. (b) Bar graph showing the quantification of number of colonies in vehicle and each treatment conditions. Error bars: mean  $\pm$  s.d., \* $P < 0.05$ .

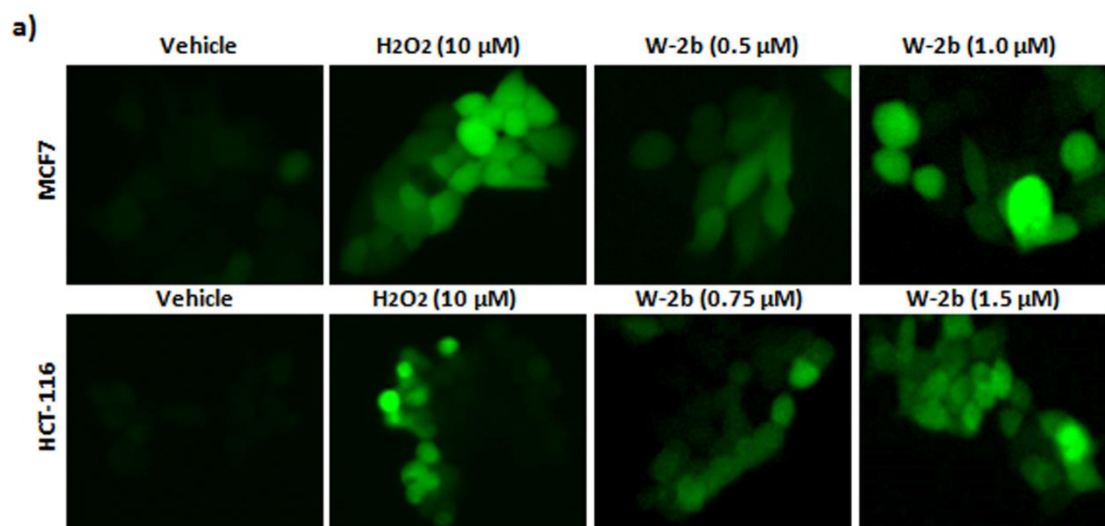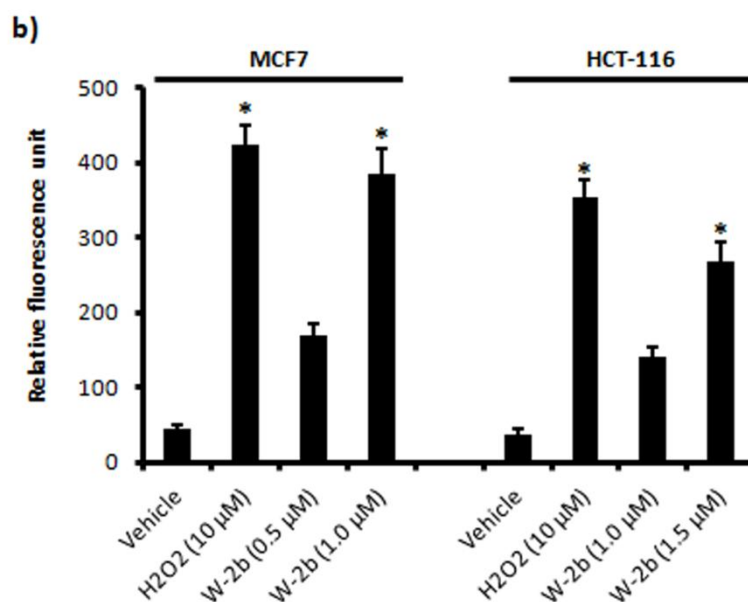

**Supplementary Figure S2.** Induction of ROS generation by **W-2b**. (a) Effects of vehicle, H<sub>2</sub>O<sub>2</sub> (10 μM) and increasing concentrations of **W-2b** on ROS generation in MCF7 and HCT-116 cells. Original magnification 20x. (b) Bar graph showing the quantification of ROS generation in terms of relative fluorescence units (RFU) in each case. Error bars: mean ± s.d. of three independent experiments. \**P* < 0.05.

# HPLC of W-2b

## NPC DIVISION IIIM JAMMU

Reported by User: System

Project Name: NP

### SAMPLE INFORMATION

|                   |              |                     |                           |
|-------------------|--------------|---------------------|---------------------------|
| Sample Name:      | W-2a         | Acquired By:        | System                    |
| Sample Type:      | Unknown      | Date Acquired:      | 5/14/2015 5:03:38 PM      |
| Vial:             | 5            | Acq. Method Set:    | Withania                  |
| Injection #:      | 1            | Date Processed:     | 5/15/2015 4:07:11 PM      |
| Injection Volume: | 5.00 ul      | Processing Method:  | Withaferin A              |
| Run Time:         | 60.0 Minutes | Channel Name:       | W2996 237.0nm-1.2         |
| Sample Set Name:  | Withania     | Proc. Chnl. Descr.: | W2996 PDA 237.0 nm at 1.2 |
| column_name       | RP-18,5um    | Flow rate:          | 0.70 ml/min               |
|                   |              | Sample conc:        | 1 mg/ml                   |
|                   |              | Mobile phase:       | ACN:Water(gradient)       |

Auto-Scaled Chromatogram

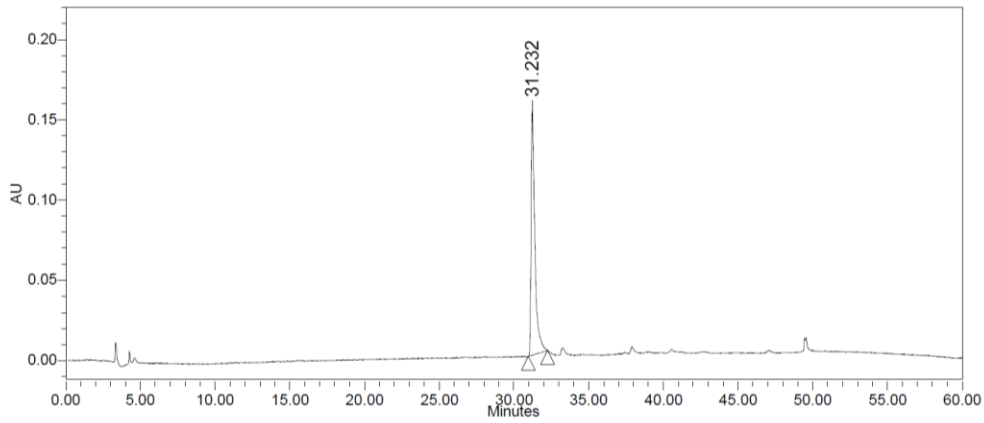

|   | RT     | Area<br>( $\mu\text{V}\cdot\text{sec}$ ) | % Area | Height<br>( $\mu\text{V}$ ) |
|---|--------|------------------------------------------|--------|-----------------------------|
| 1 | 31.232 | 2717828                                  | 100.00 | 152379                      |

# HRMS of W-2b

## Qualitative Compound Report

**Data File** W-2b **Sample Name** W-2b  
**Sample Type** Sample **Position** Vial 7  
**Instrument Name** Instrument 1 **User Name**  
**Acq Method** vishal\_12-01-13.m **Acquired Time** 17-06-2015 PM 12:52:38  
**IRM Calibration Status** Success **DA Method** daily\_report.m  
**Comment**

**Sample Group** Info.  
**Acquisition SW** 6200 series TOF/6500 series  
**Version** Q-TOF B.05.01 (B5125)

### Compound Table

| Compound Label       | RT    | Mass     | Formula       | MFG Formula   | MFG Diff (ppm) | DB Formula    |
|----------------------|-------|----------|---------------|---------------|----------------|---------------|
| Cpd 7: C35 H42 N2 O9 | 0.265 | 634.2888 | C35 H42 N2 O9 | C35 H42 N2 O9 | 0.36           | C35 H42 N2 O9 |

| Compound Label       | m/z      | RT    | Algorithm                 | Mass     |
|----------------------|----------|-------|---------------------------|----------|
| Cpd 7: C35 H42 N2 O9 | 635.2961 | 0.265 | Find by Molecular Feature | 634.2888 |

### MFE MS Spectrum

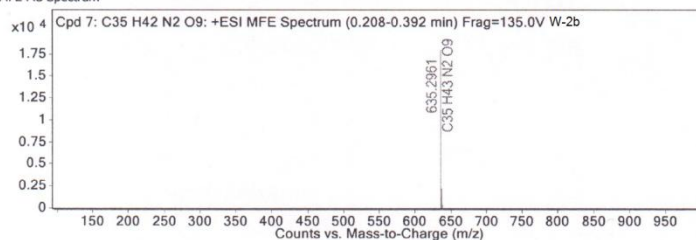

### MS Spectrum Peak List

| m/z      | z | Abund    | Formula       | Ion    |
|----------|---|----------|---------------|--------|
| 635.2961 | 1 | 17890.38 | C35 H43 N2 O9 | (M+H)+ |
| 636.2992 | 1 | 6736.49  | C35 H43 N2 O9 | (M+H)+ |
| 637.3036 | 1 | 2241.15  | C35 H43 N2 O9 | (M+H)+ |
| 638.3013 | 1 | 443.86   | C35 H43 N2 O9 | (M+H)+ |

### Predicted Isotope Match Table

| Isotope | m/z      | Calc m/z | Diff (ppm) | Abund % | Calc Abund % | Abund Sum % | Calc Abund Sum % |
|---------|----------|----------|------------|---------|--------------|-------------|------------------|
| 1       | 635.2961 | 635.2963 | 0.38       | 100     | 100          | 65.5        | 66.44            |
| 2       | 636.2992 | 636.2996 | 0.66       | 37.65   | 39.42        | 24.67       | 26.19            |
| 3       | 637.3036 | 637.3024 | -1.82      | 12.53   | 9.41         | 8.21        | 6.26             |
| 4       | 638.3013 | 638.3051 | 6.06       | 2.48    | 1.67         | 1.63        | 1.11             |

--- End Of Report ---

# <sup>1</sup>H NMR of W-1a

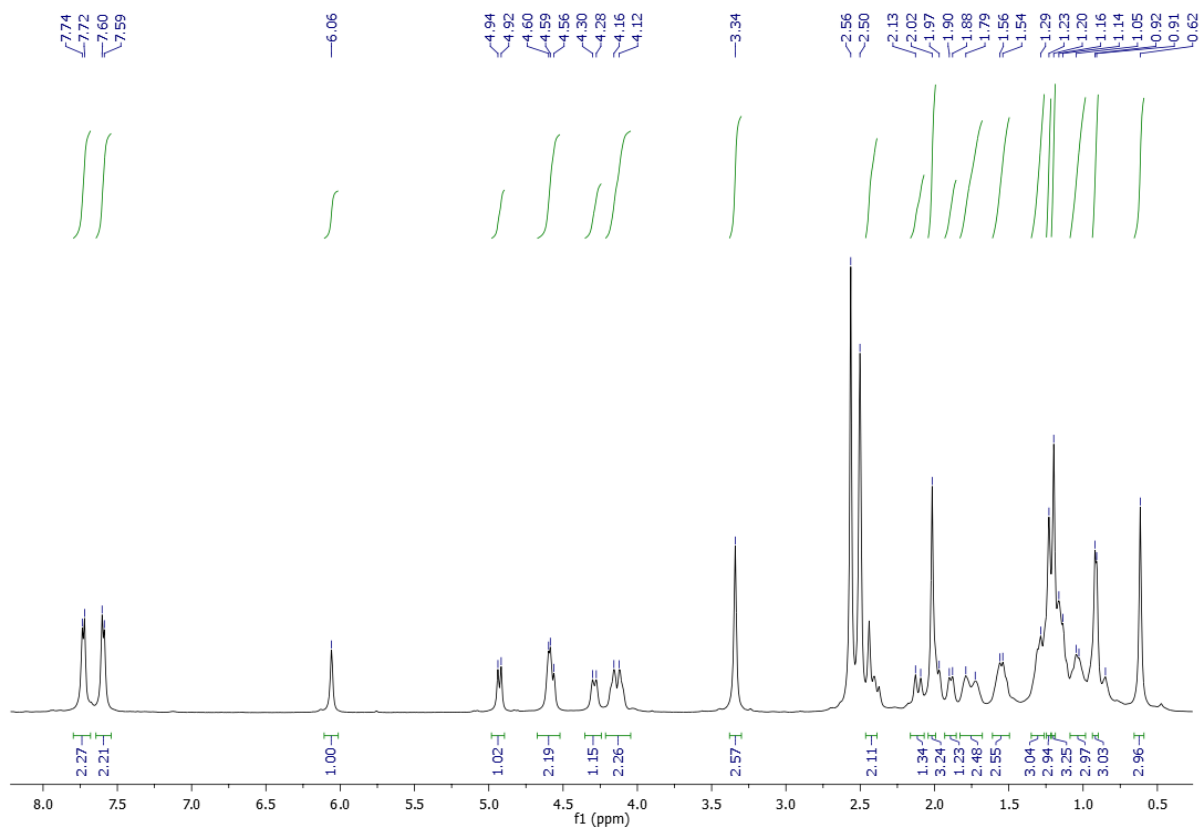

# $^{13}\text{C}$ NMR of W-1a

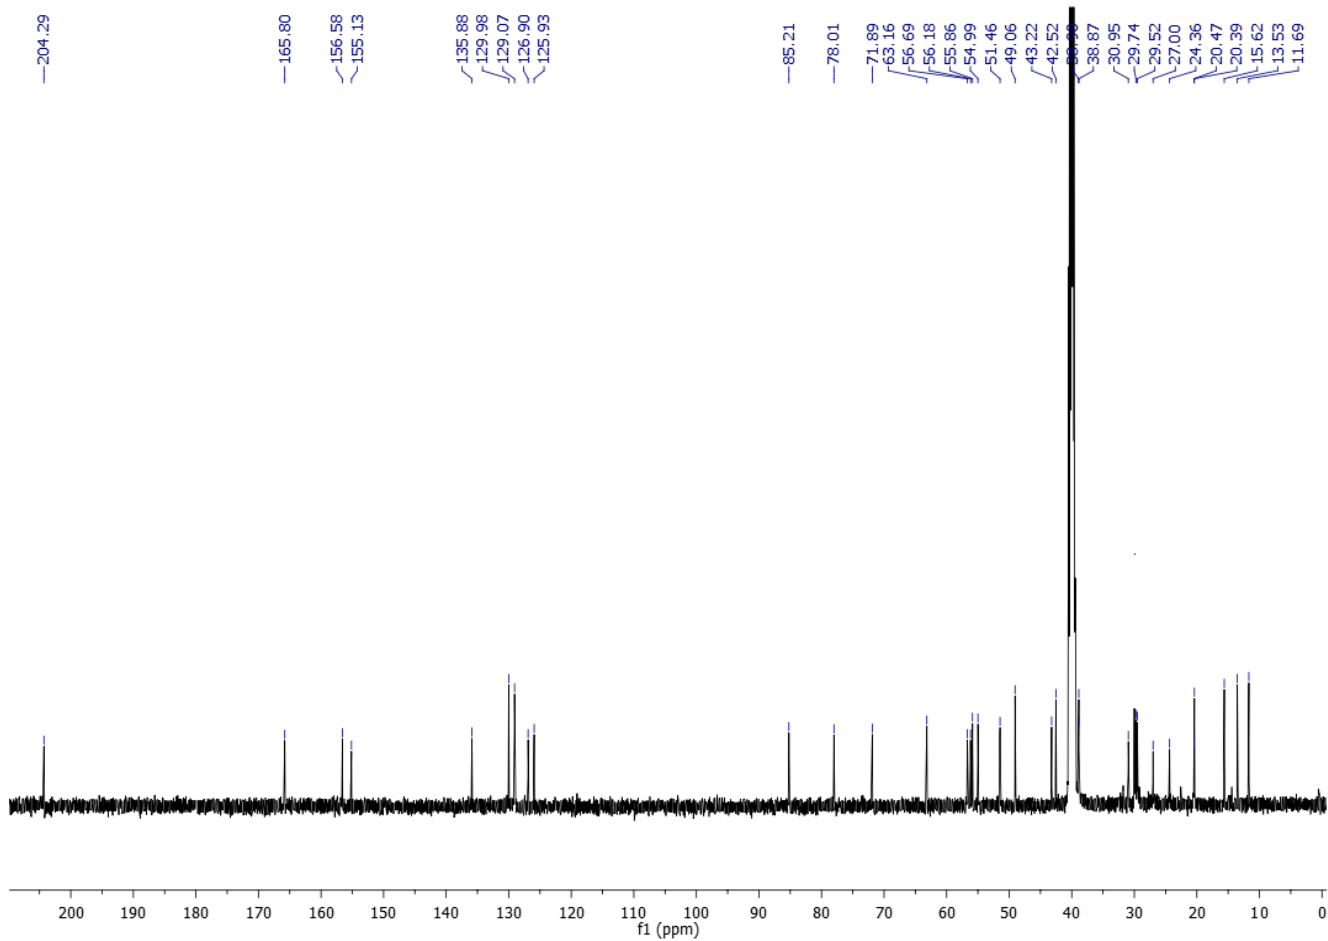

# <sup>1</sup>H NMR of W-1b

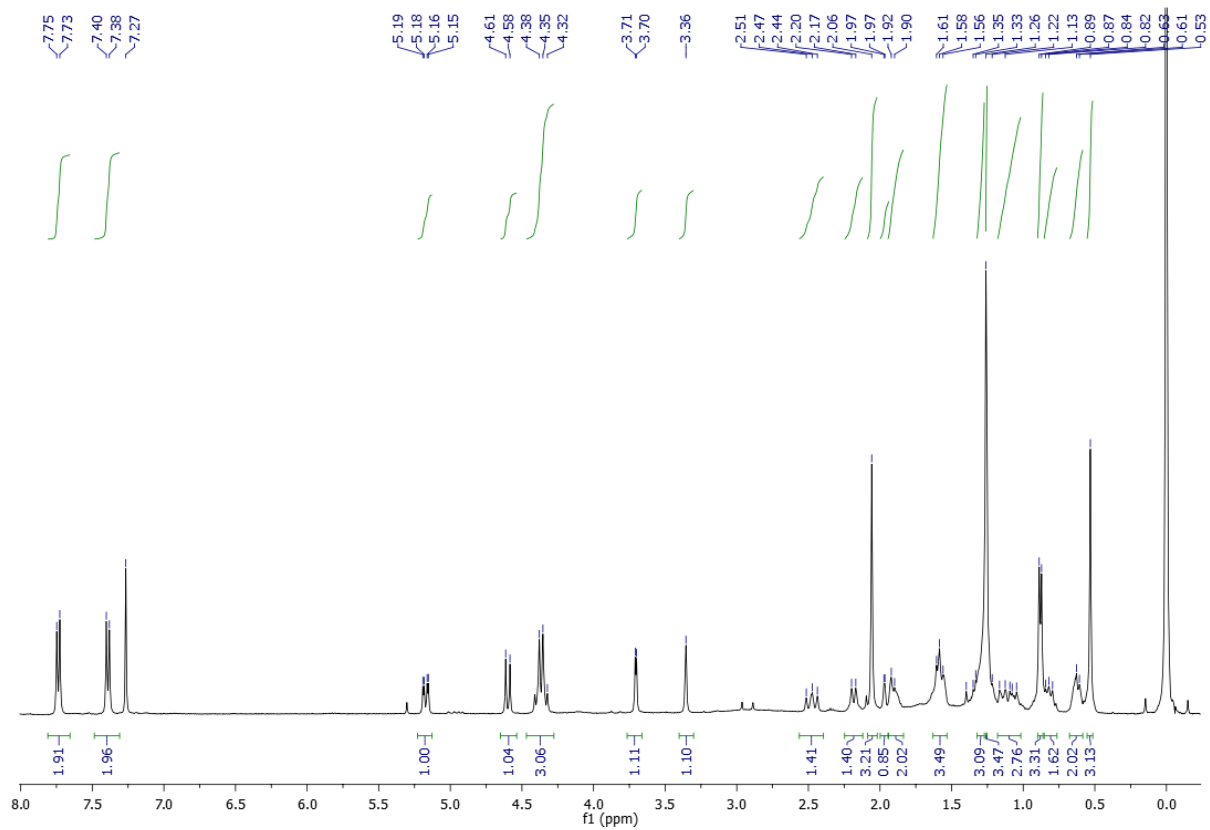



# <sup>13</sup>C NMR of W-1b

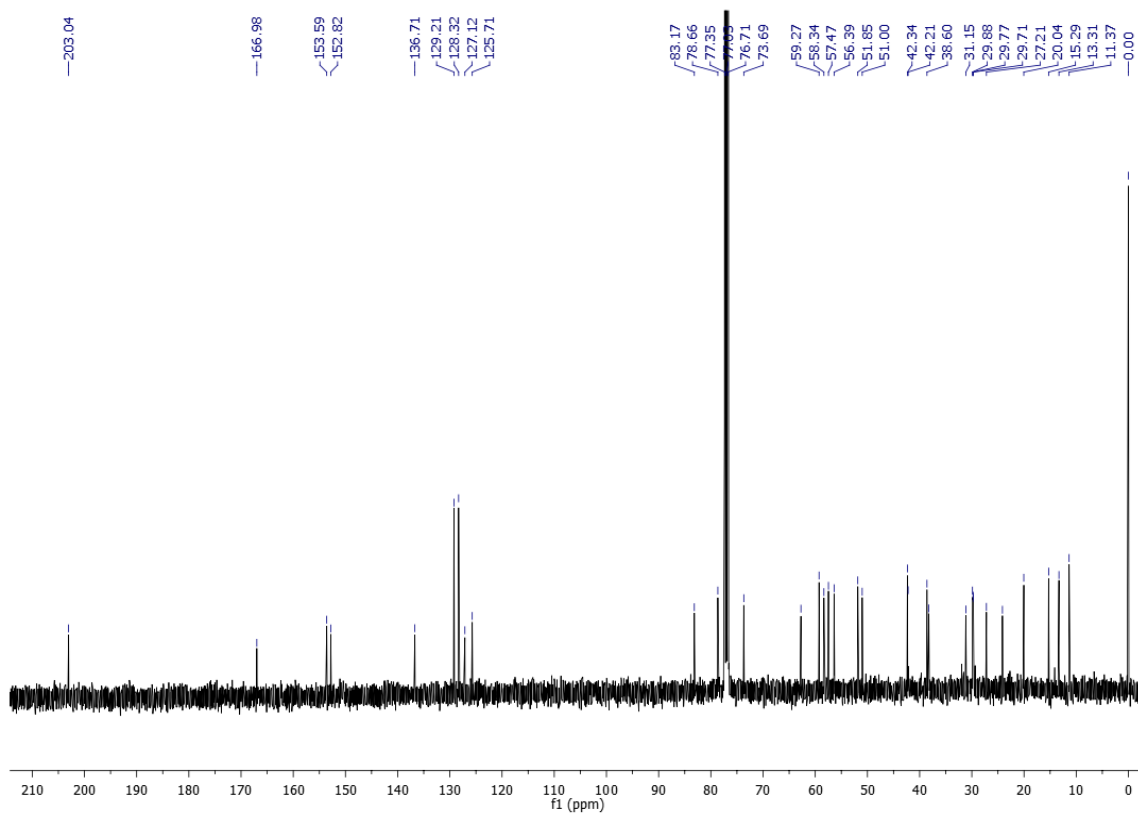

# <sup>1</sup>H NMR of W-2a

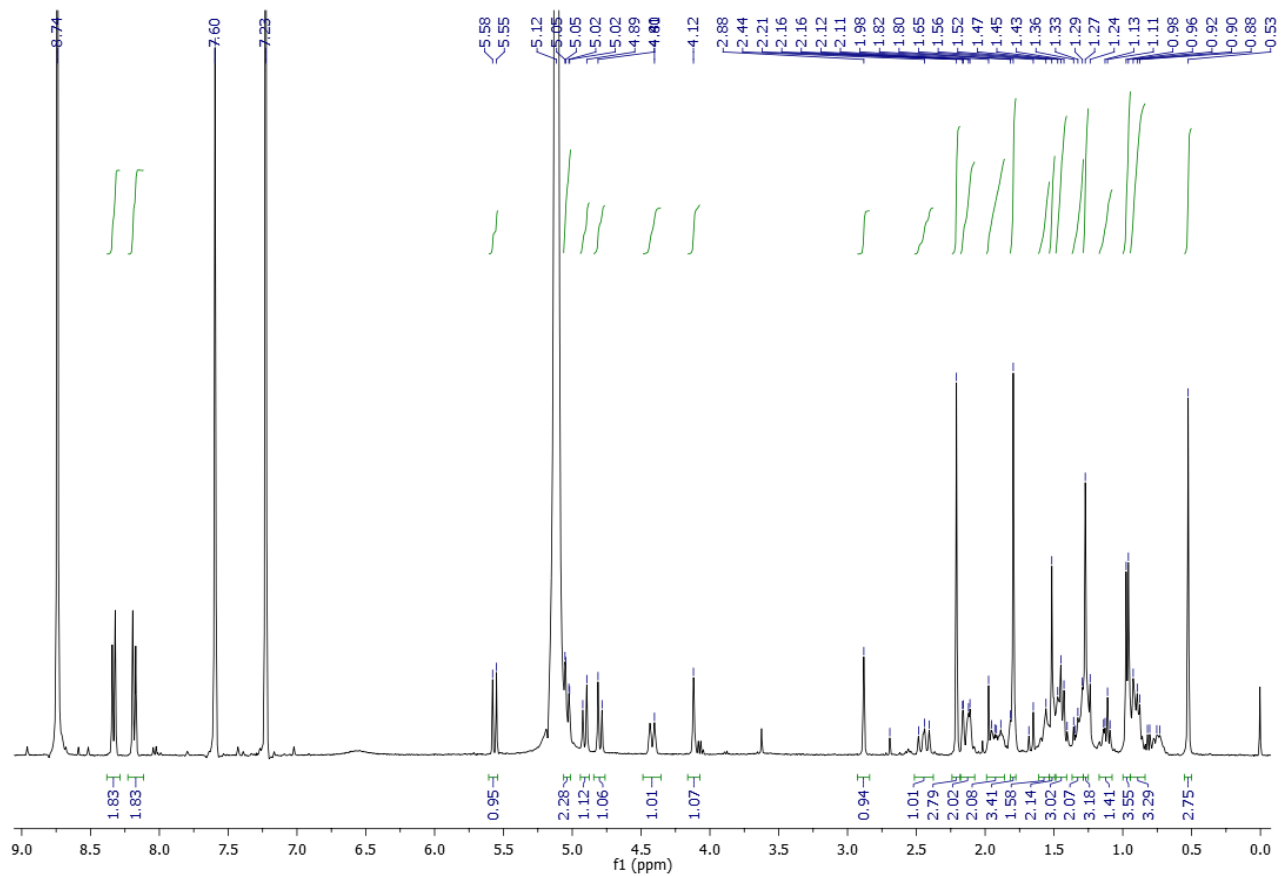

# <sup>13</sup>C NMR of W-2a

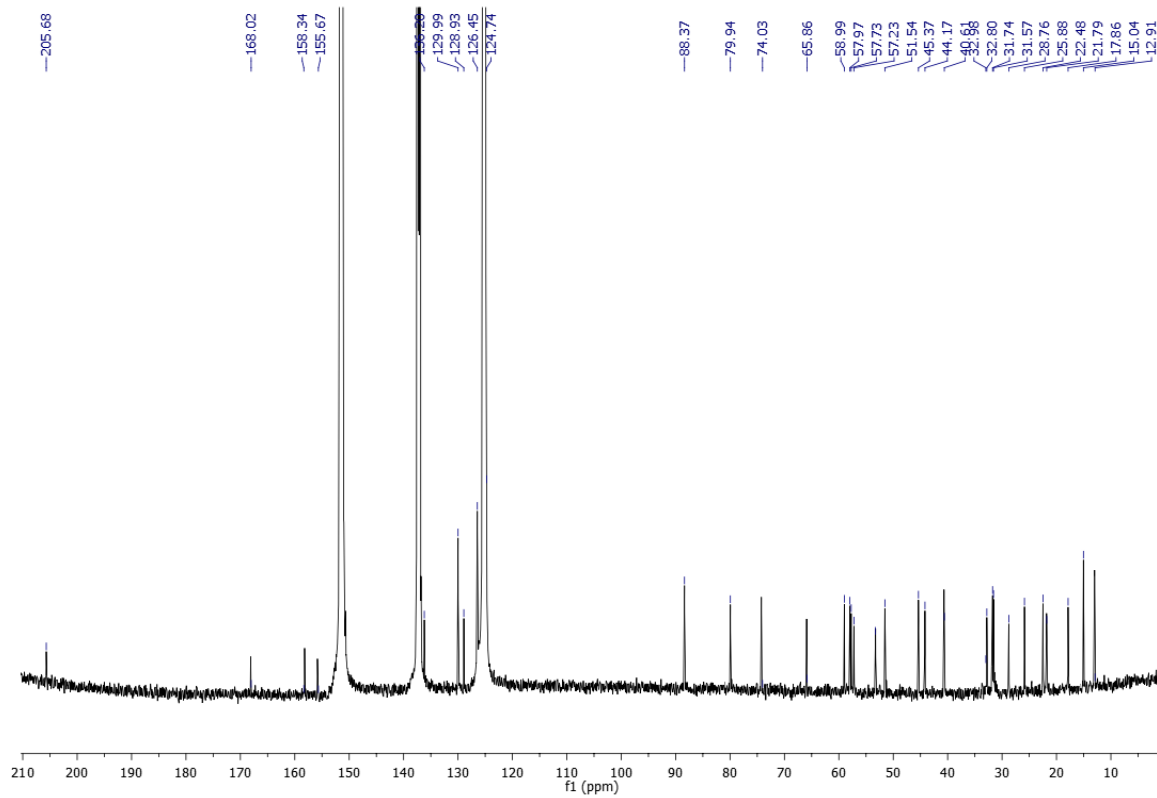

# <sup>1</sup>H NMR of W-2b

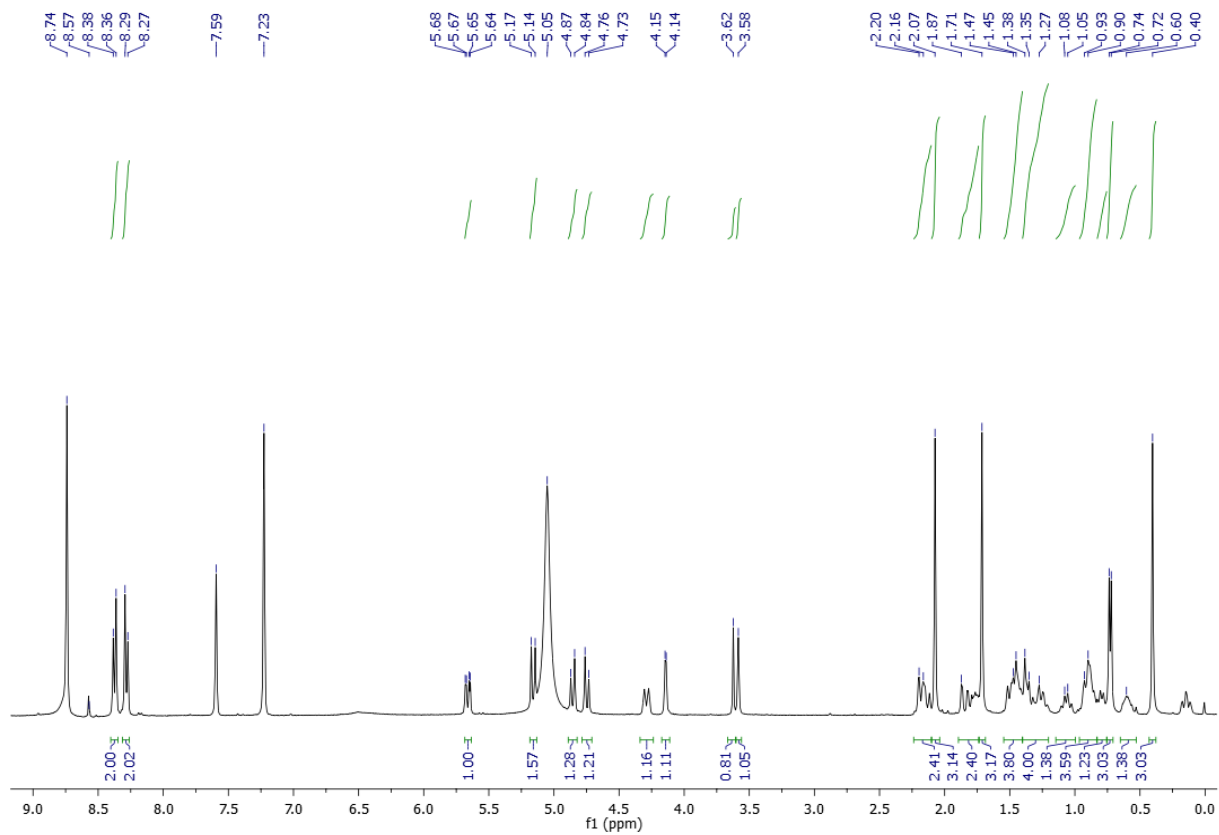

# <sup>13</sup>C NMR of W-2b

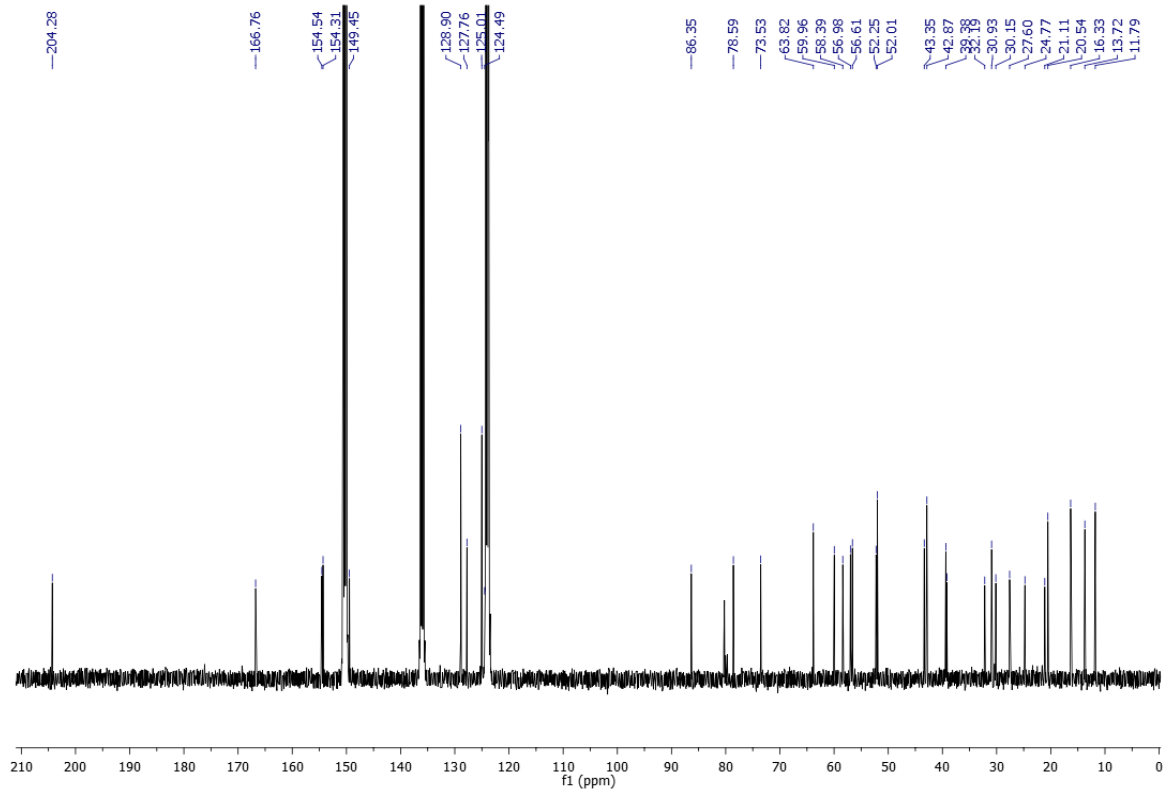

# <sup>1</sup>H NMR of W-3a

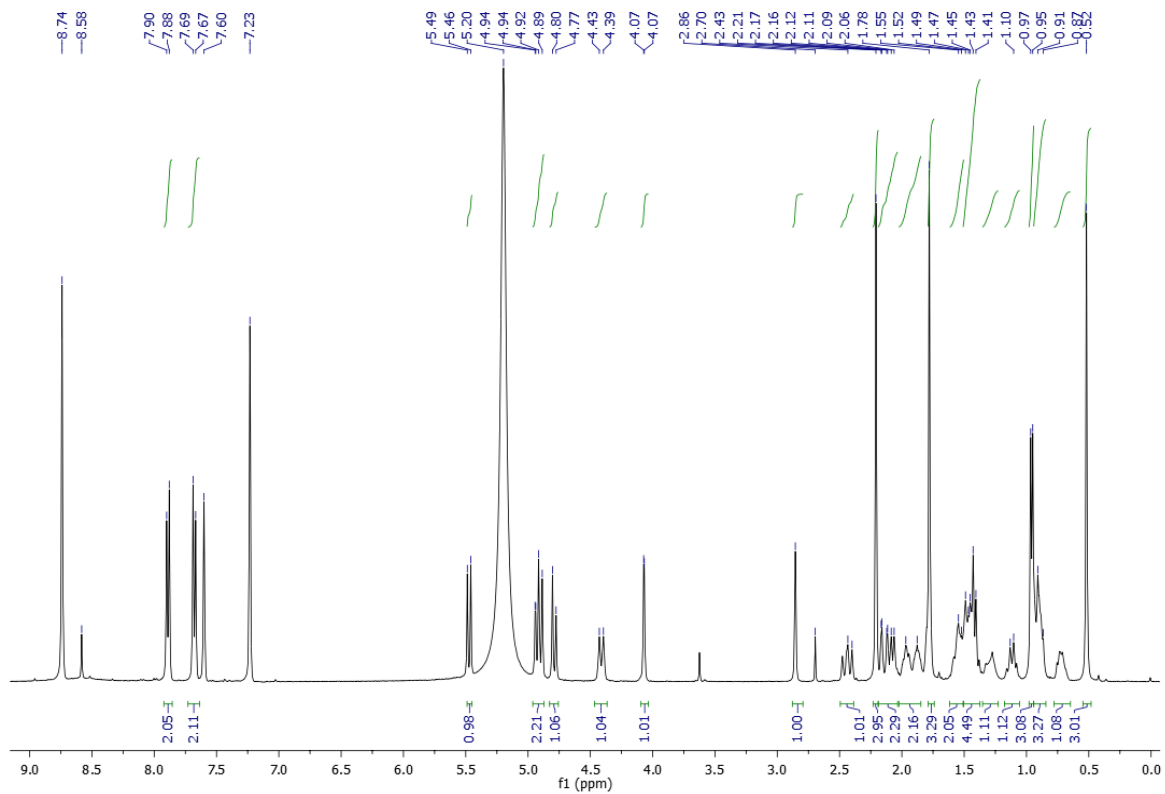

# <sup>13</sup>C NMR of W-3a

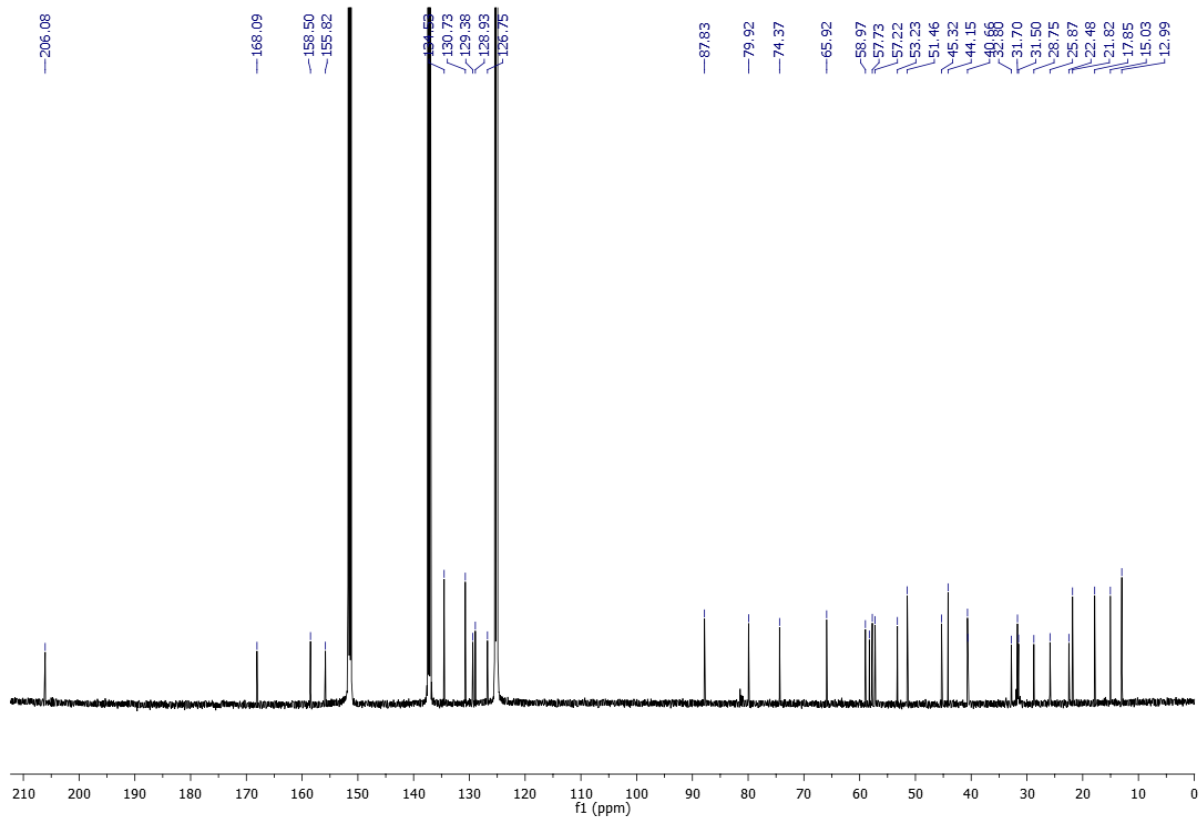

# <sup>1</sup>H NMR of W-3b

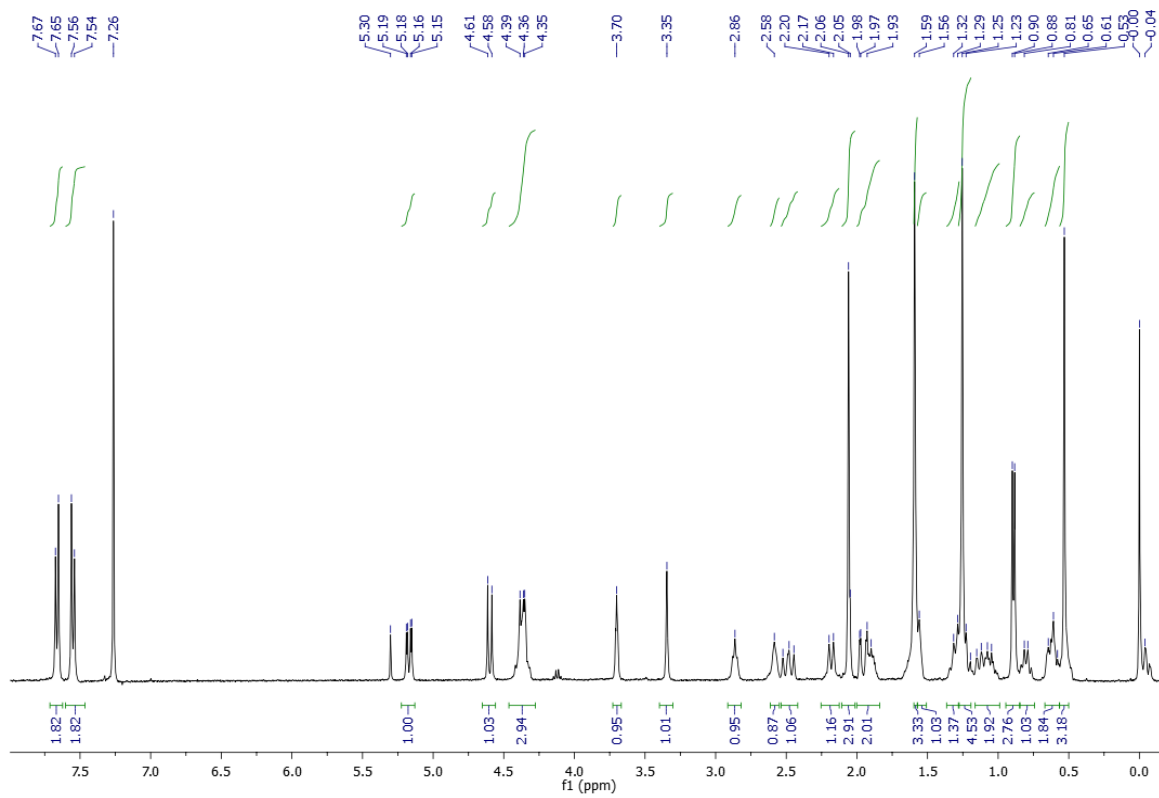



# <sup>13</sup>C NMR of W-3b

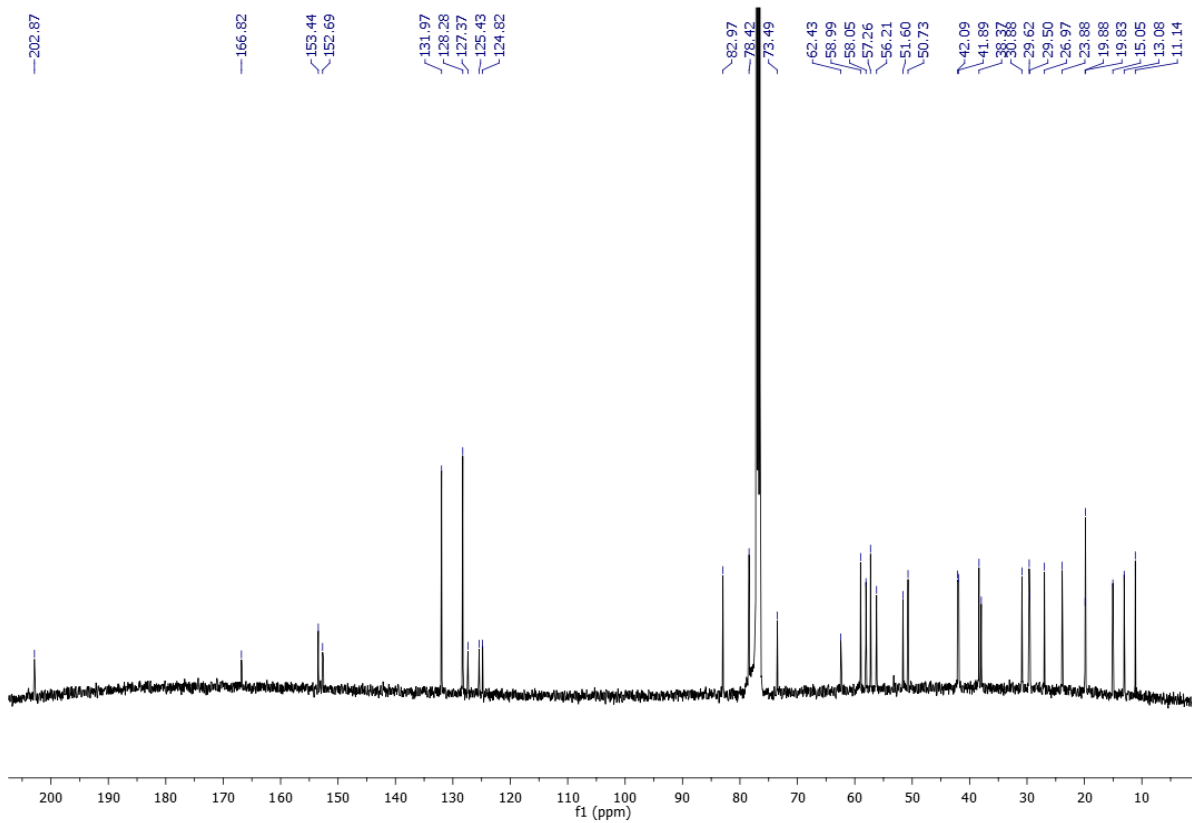

# <sup>1</sup>H NMR of W-4a

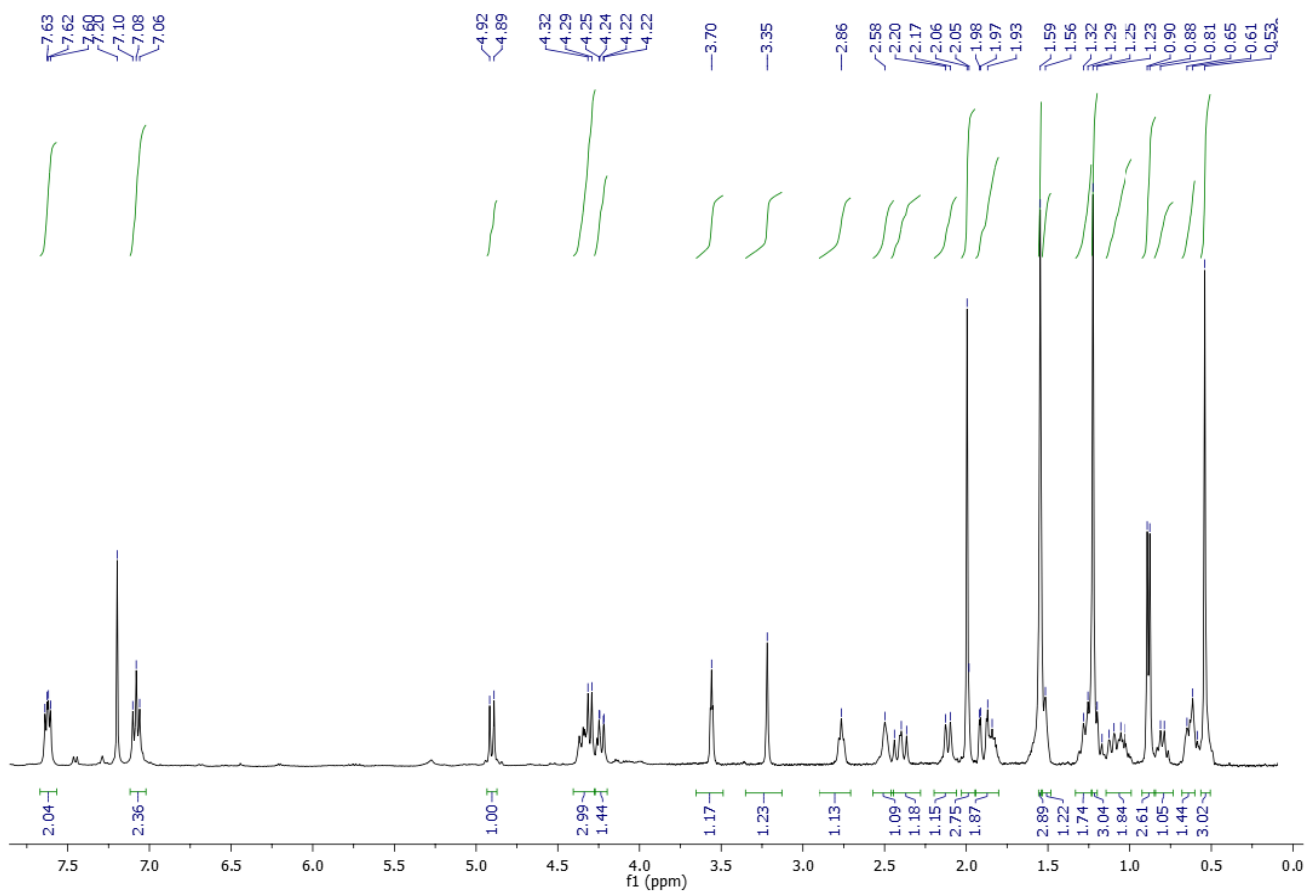

# <sup>13</sup>C NMR of W-4a

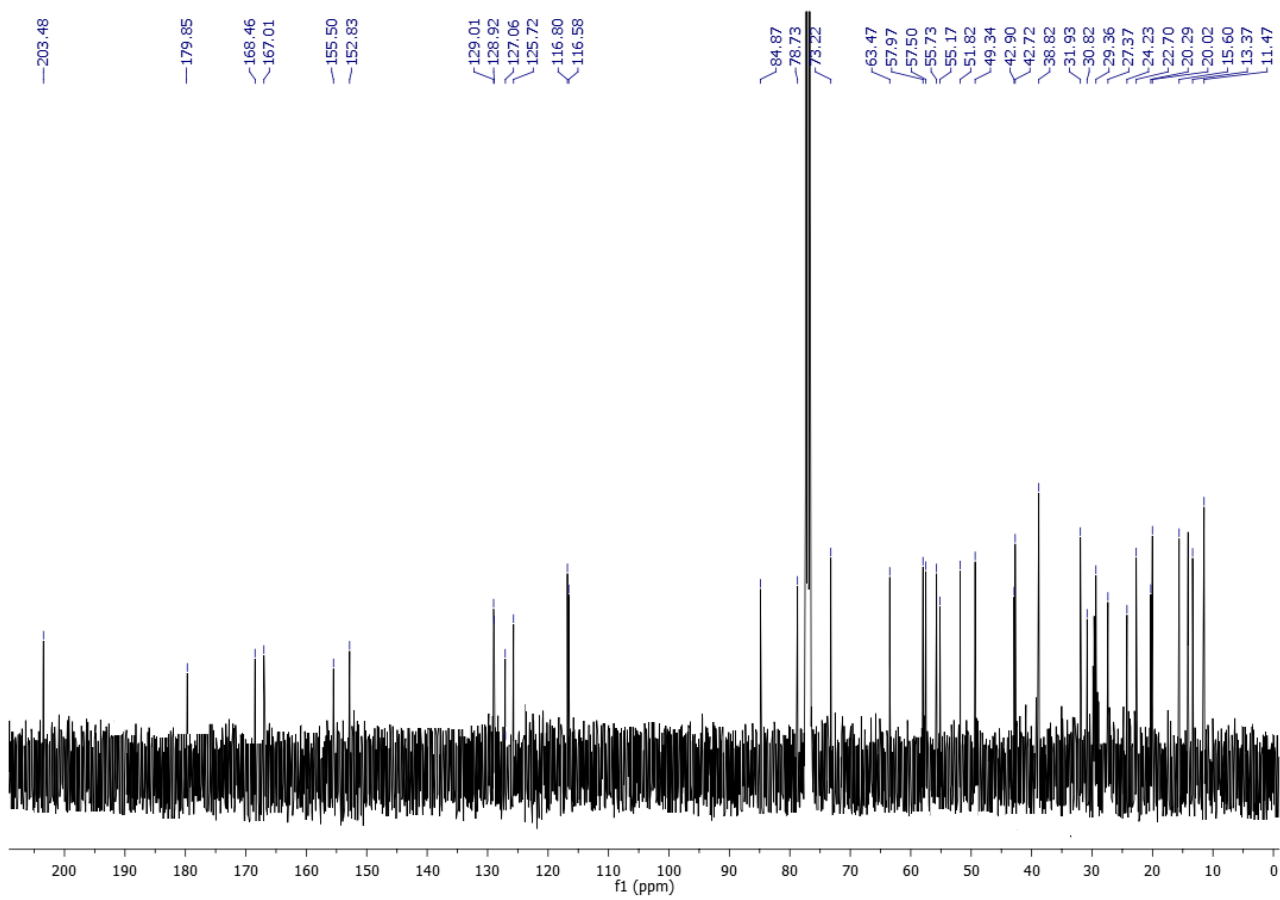

# <sup>1</sup>H NMR of W-4b

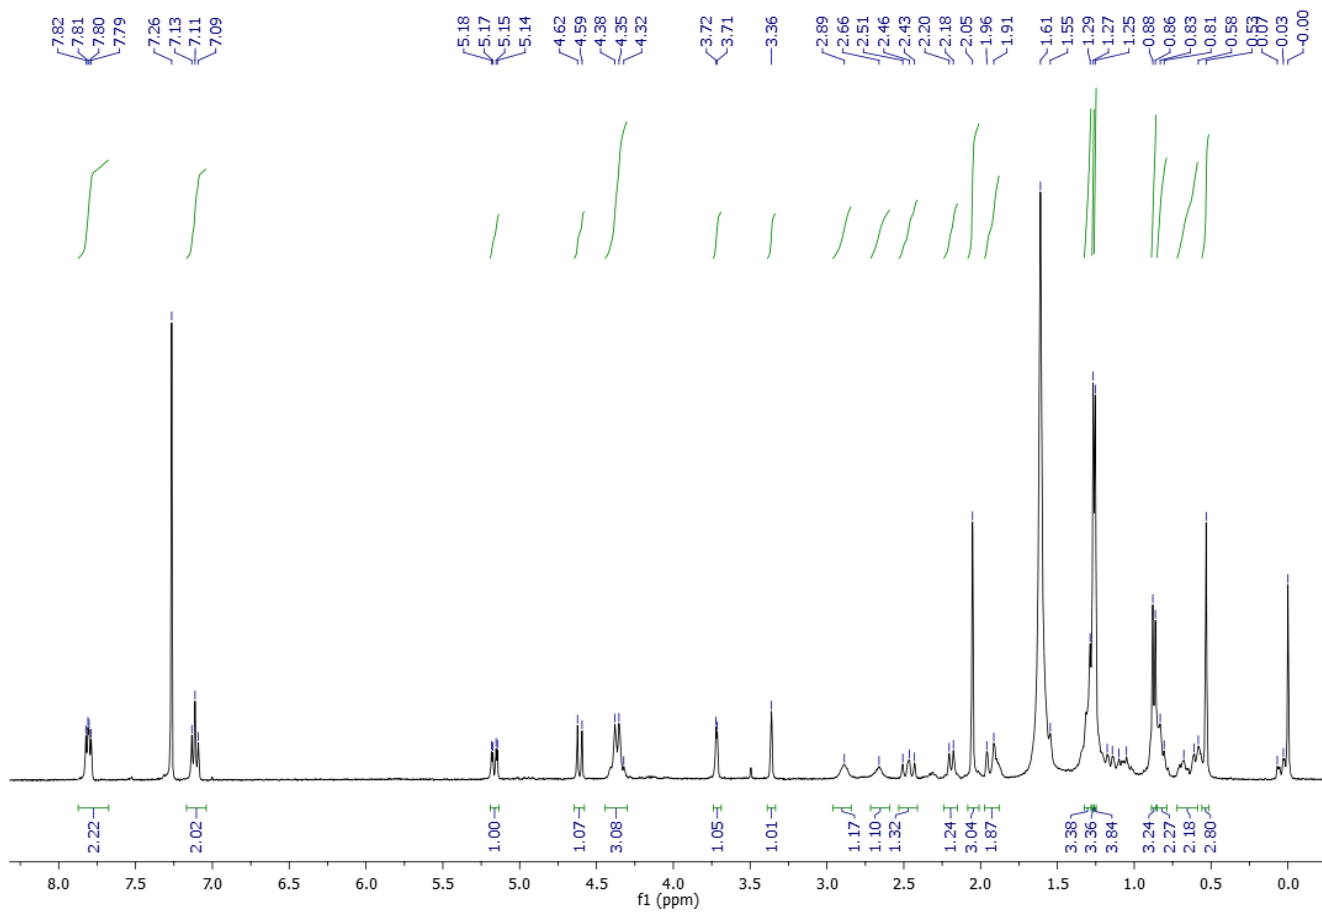

# <sup>13</sup>C NMR of W-4b

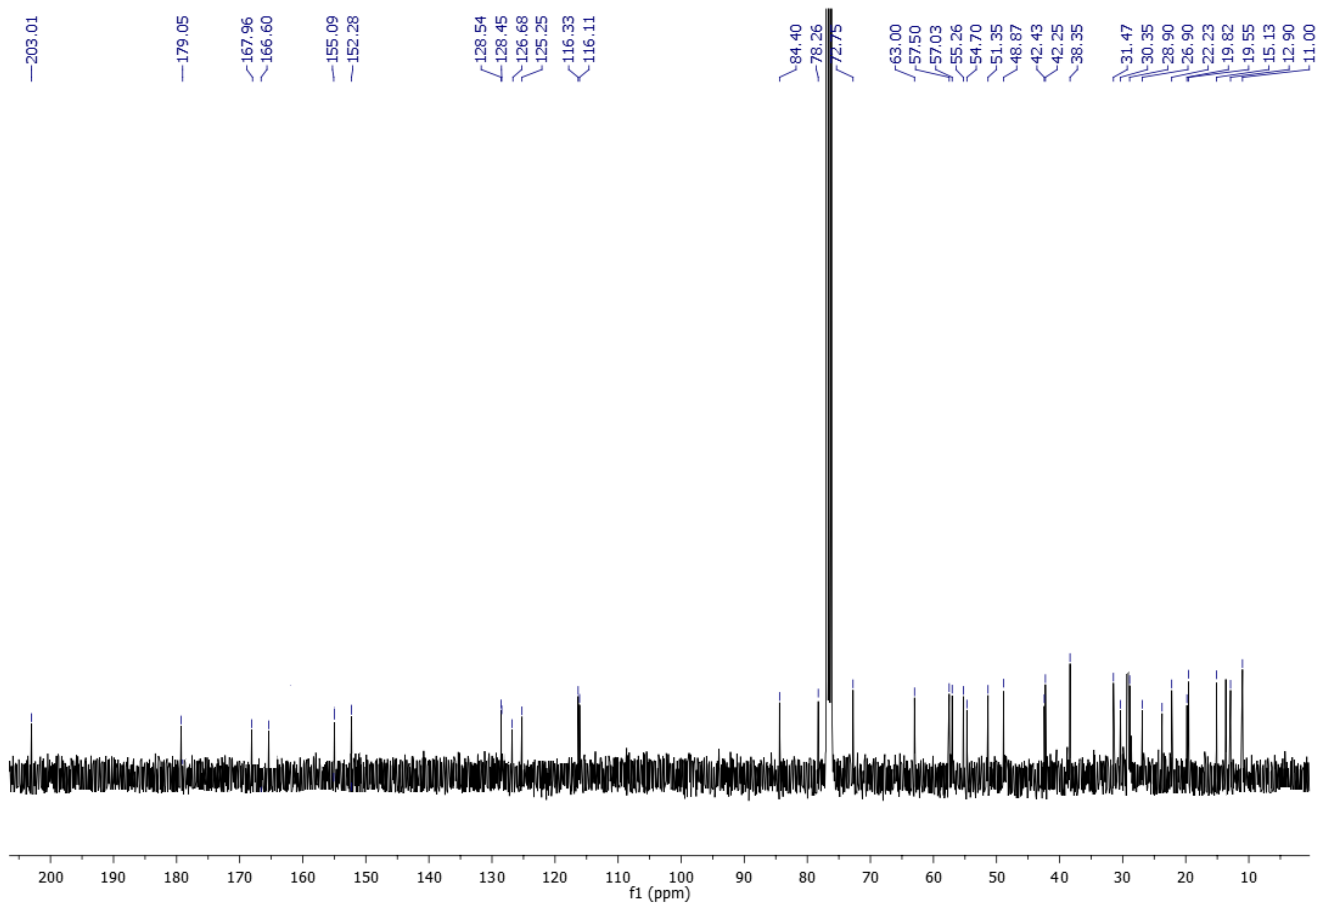

# <sup>1</sup>H NMR of W-5a

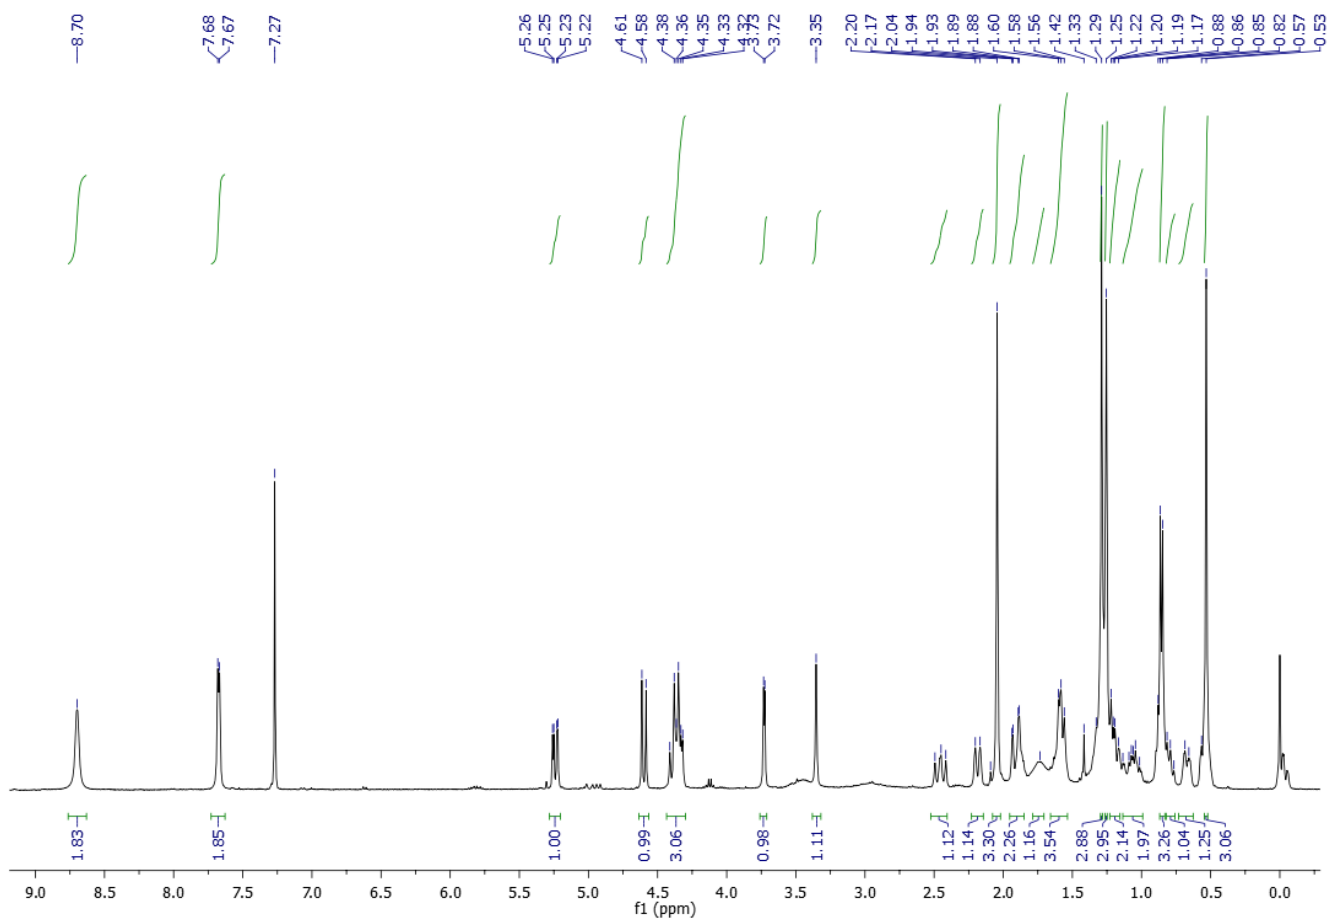

# <sup>13</sup>C NMR of W-5a

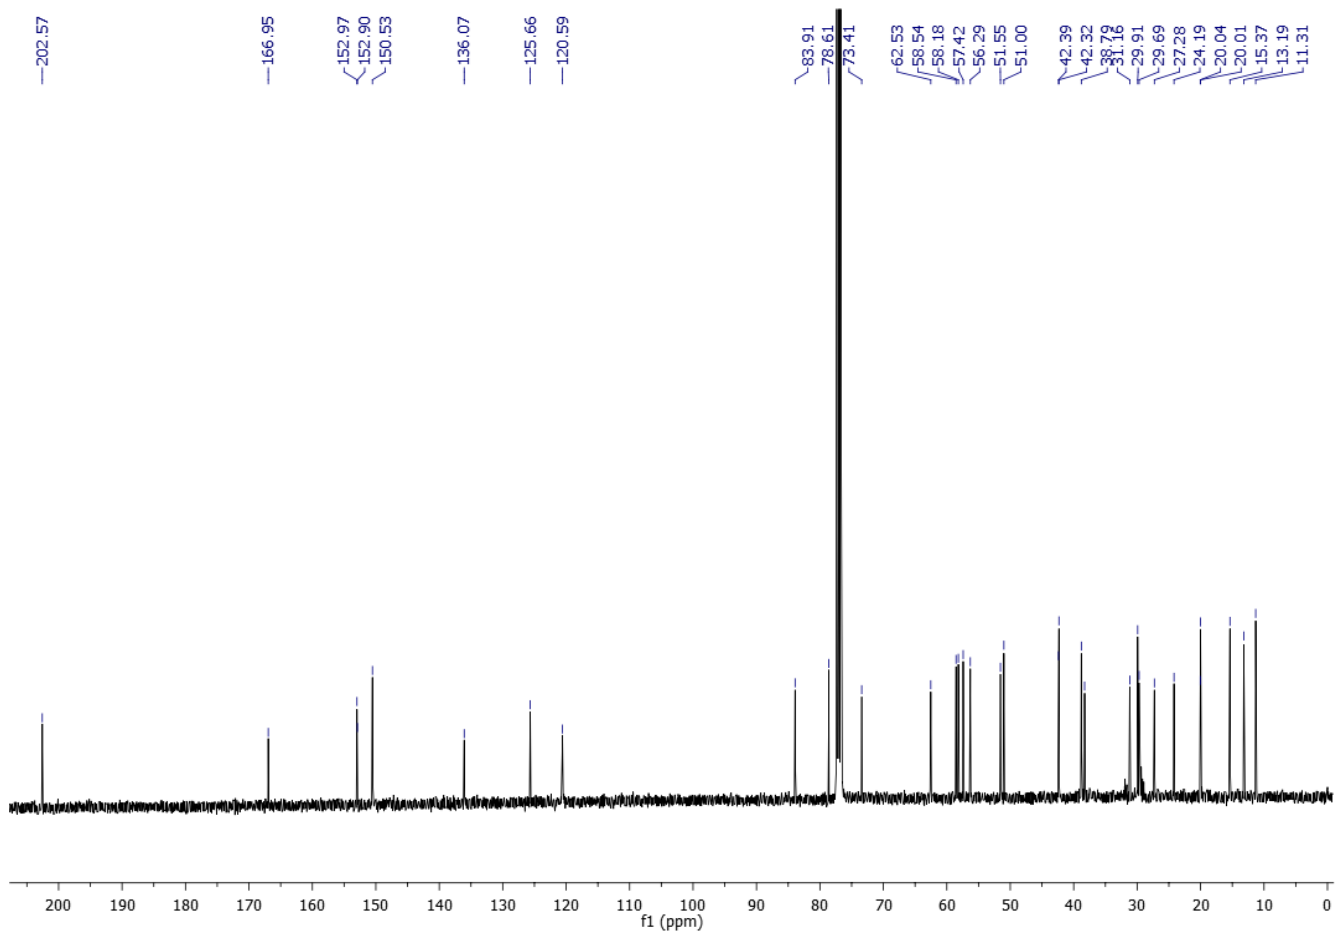

# <sup>1</sup>H NMR of W-5b

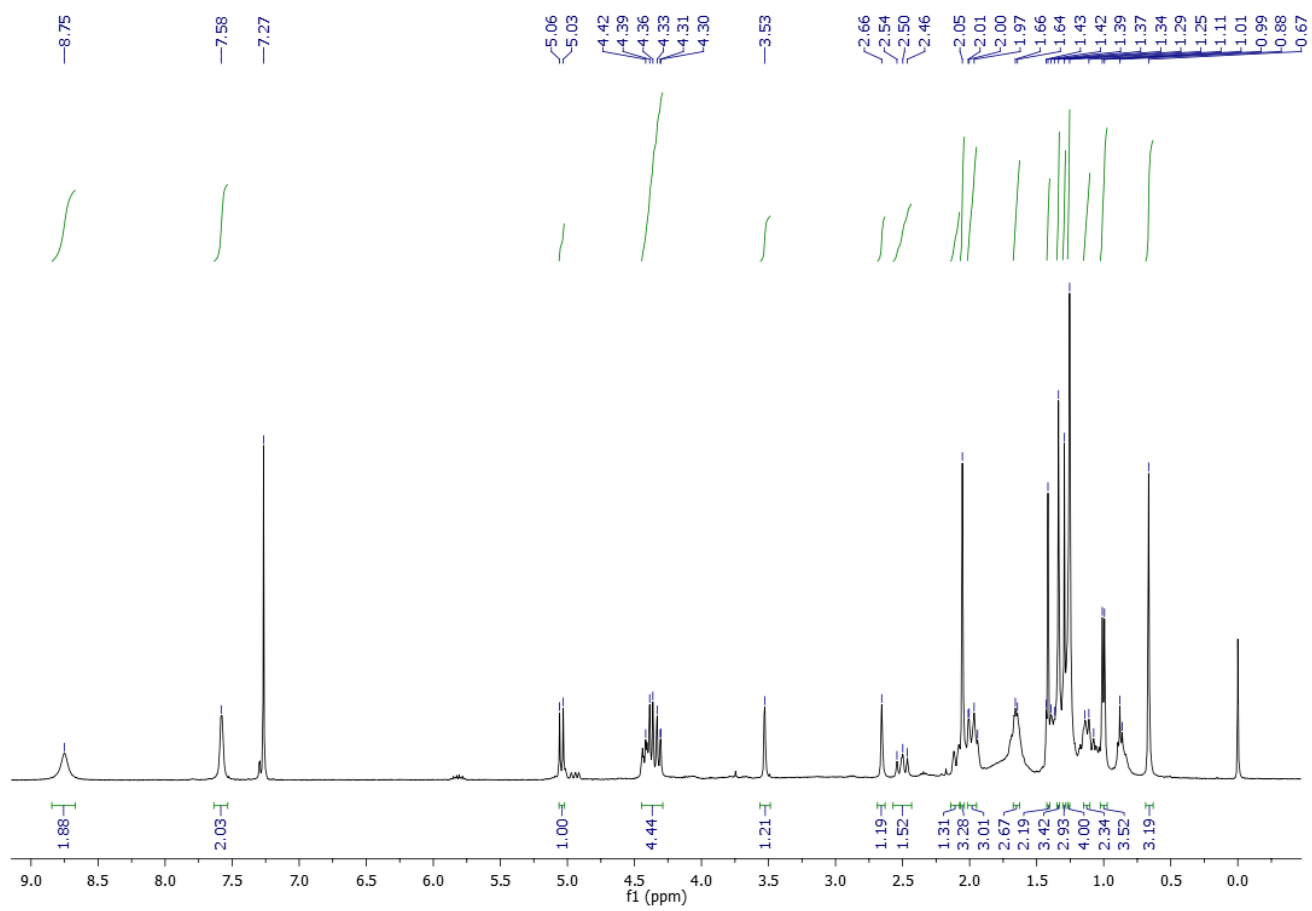



# <sup>1</sup>H NMR of W-5b

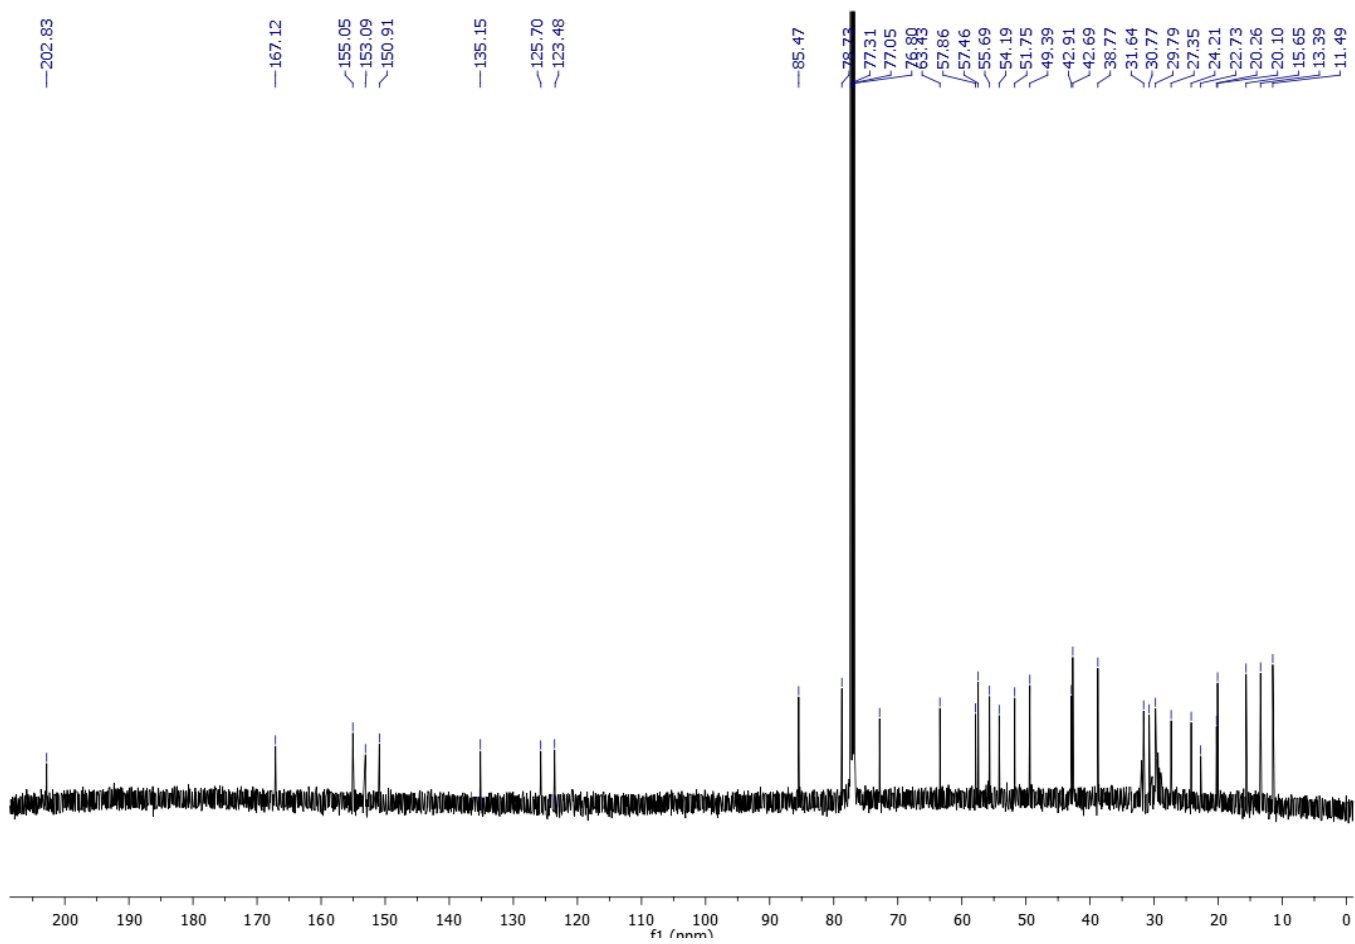

# <sup>1</sup>H NMR of W-6a

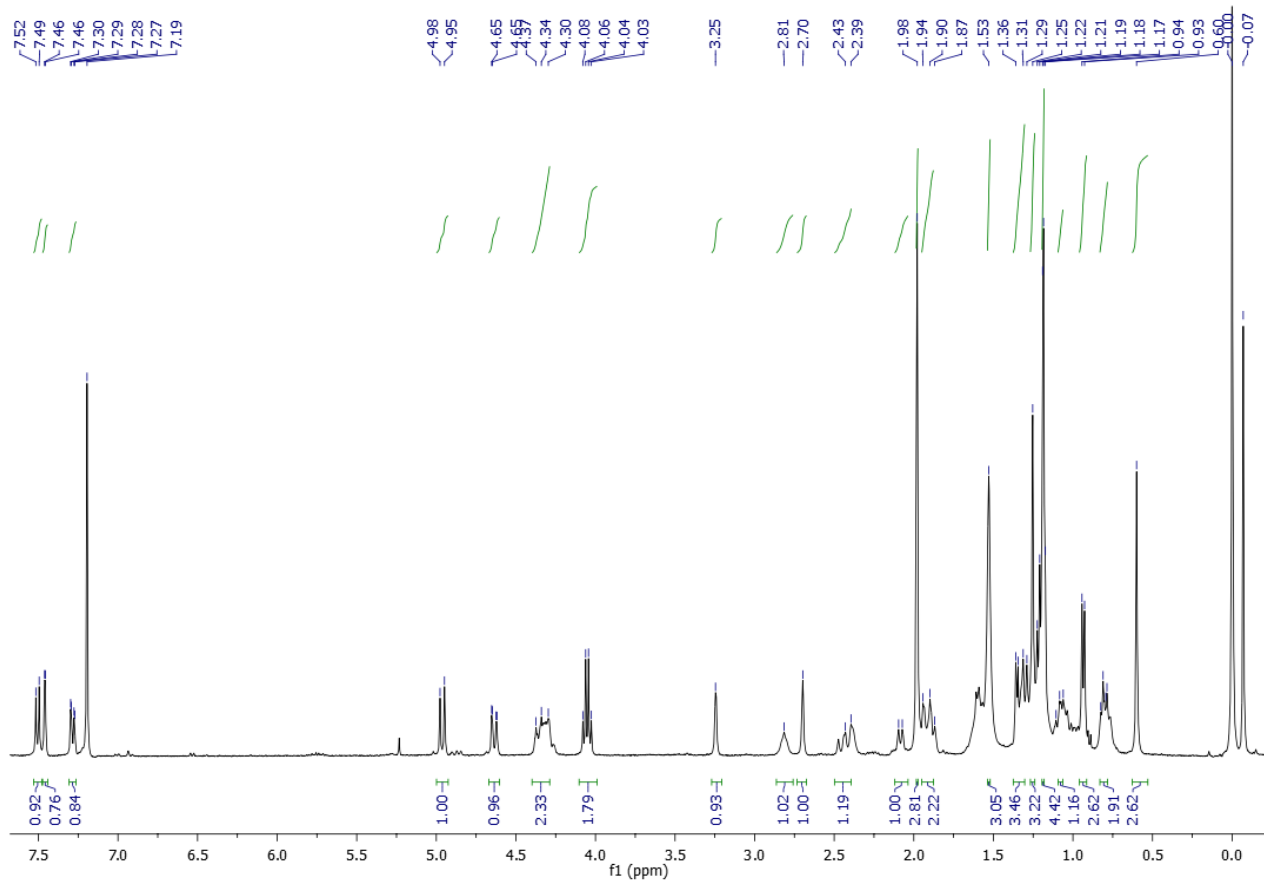

# <sup>13</sup>C NMR of W-6a

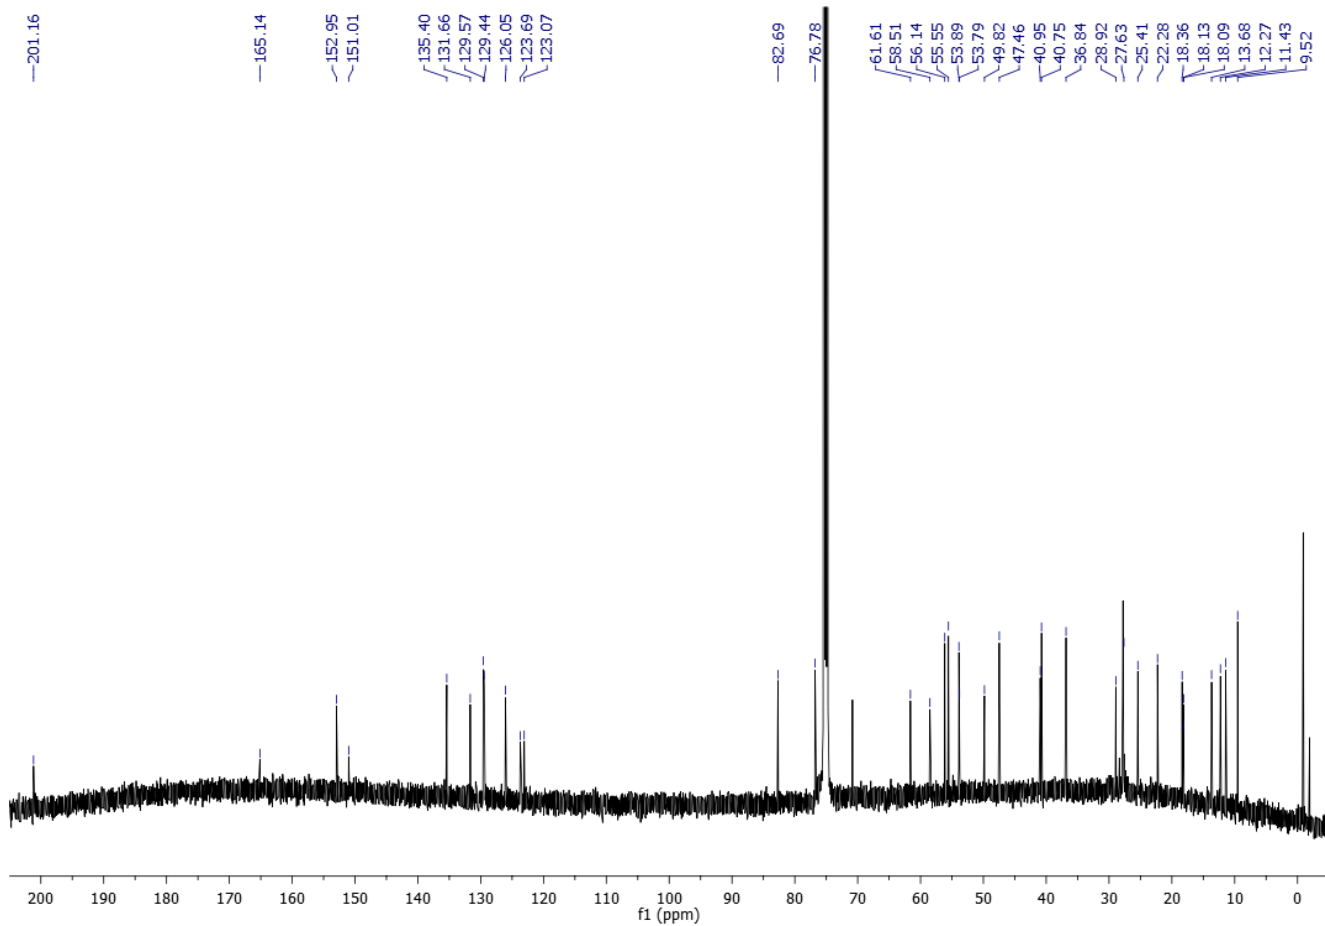

# <sup>1</sup>H NMR of W-6b

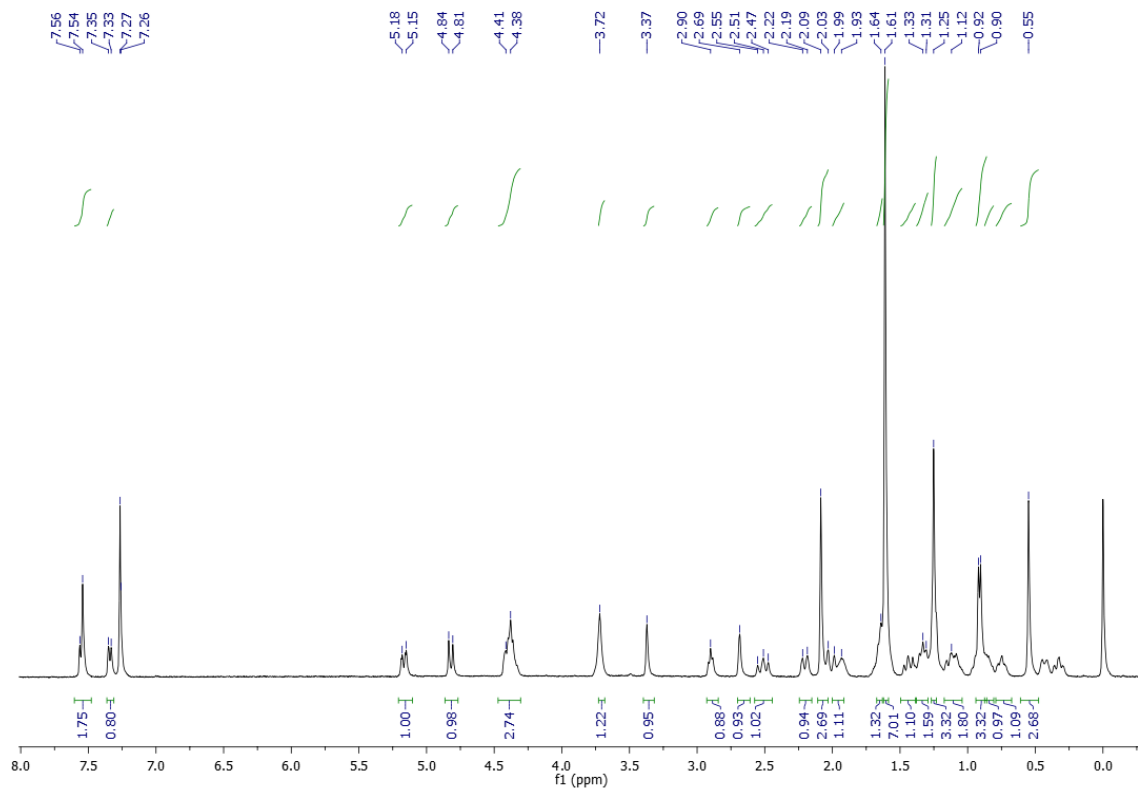

# <sup>13</sup>C NMR of W-6b

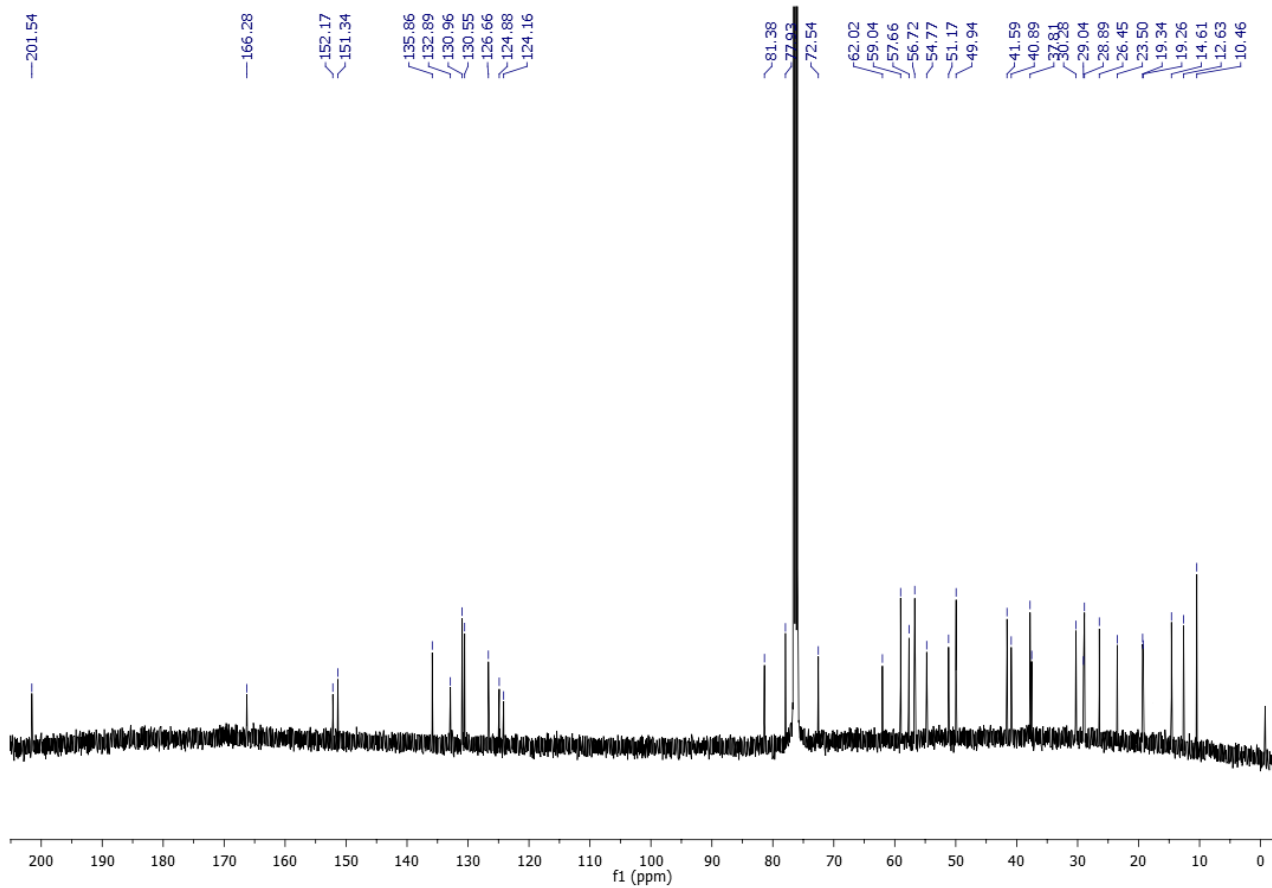

# <sup>1</sup>H NMR of W-7a

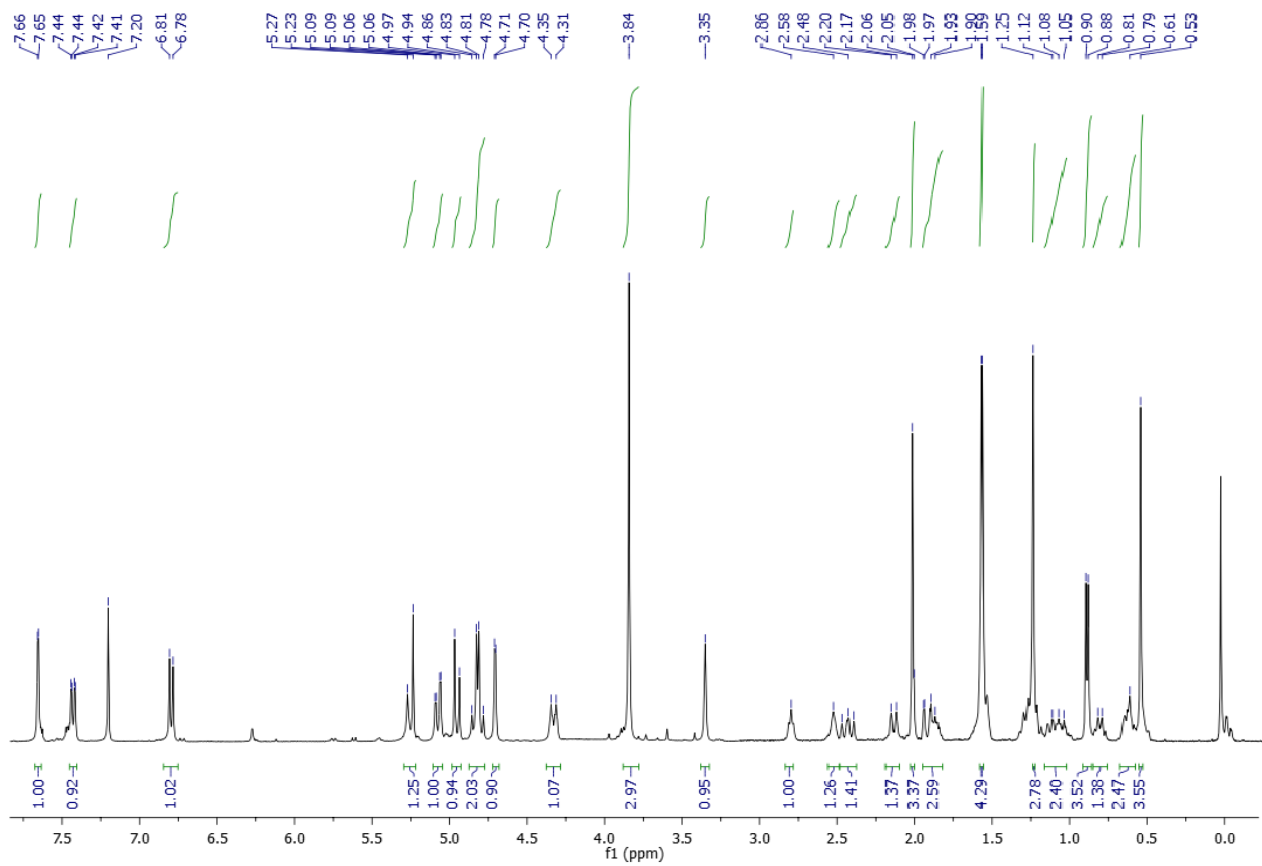

# <sup>13</sup>C NMR of W-7a

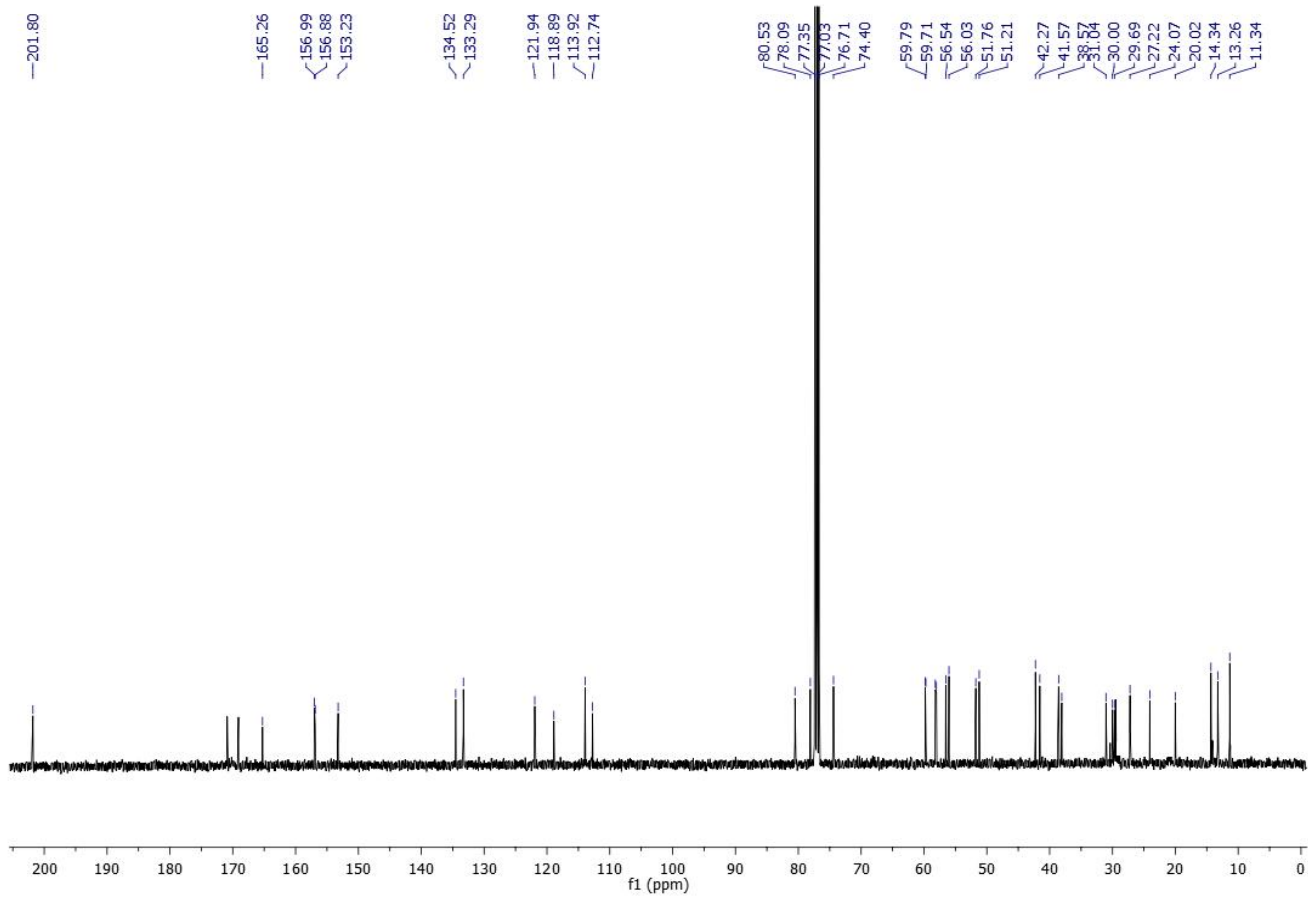

# <sup>1</sup>H NMR of W-8a

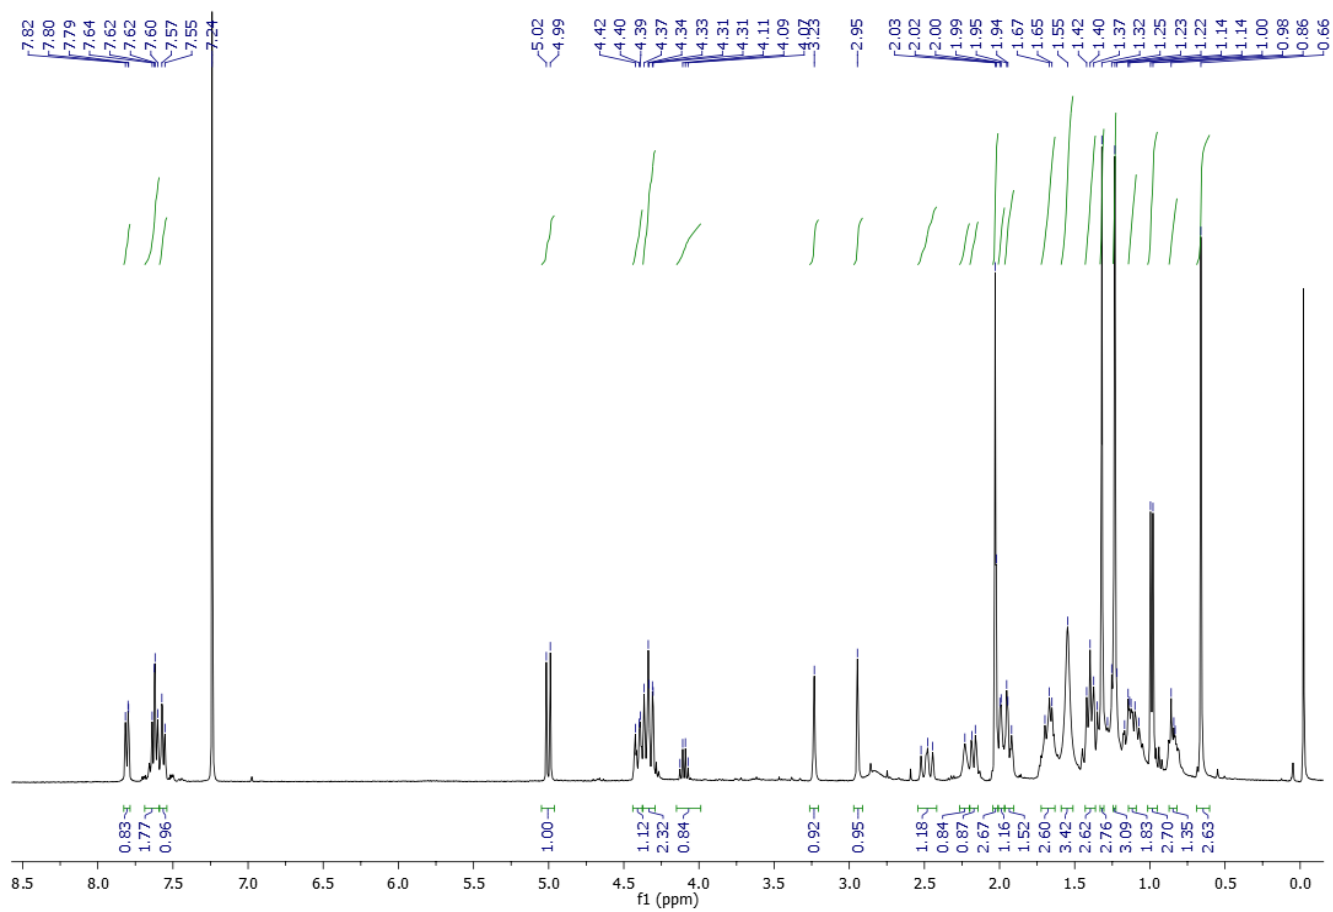



# <sup>13</sup>C NMR of W-8a

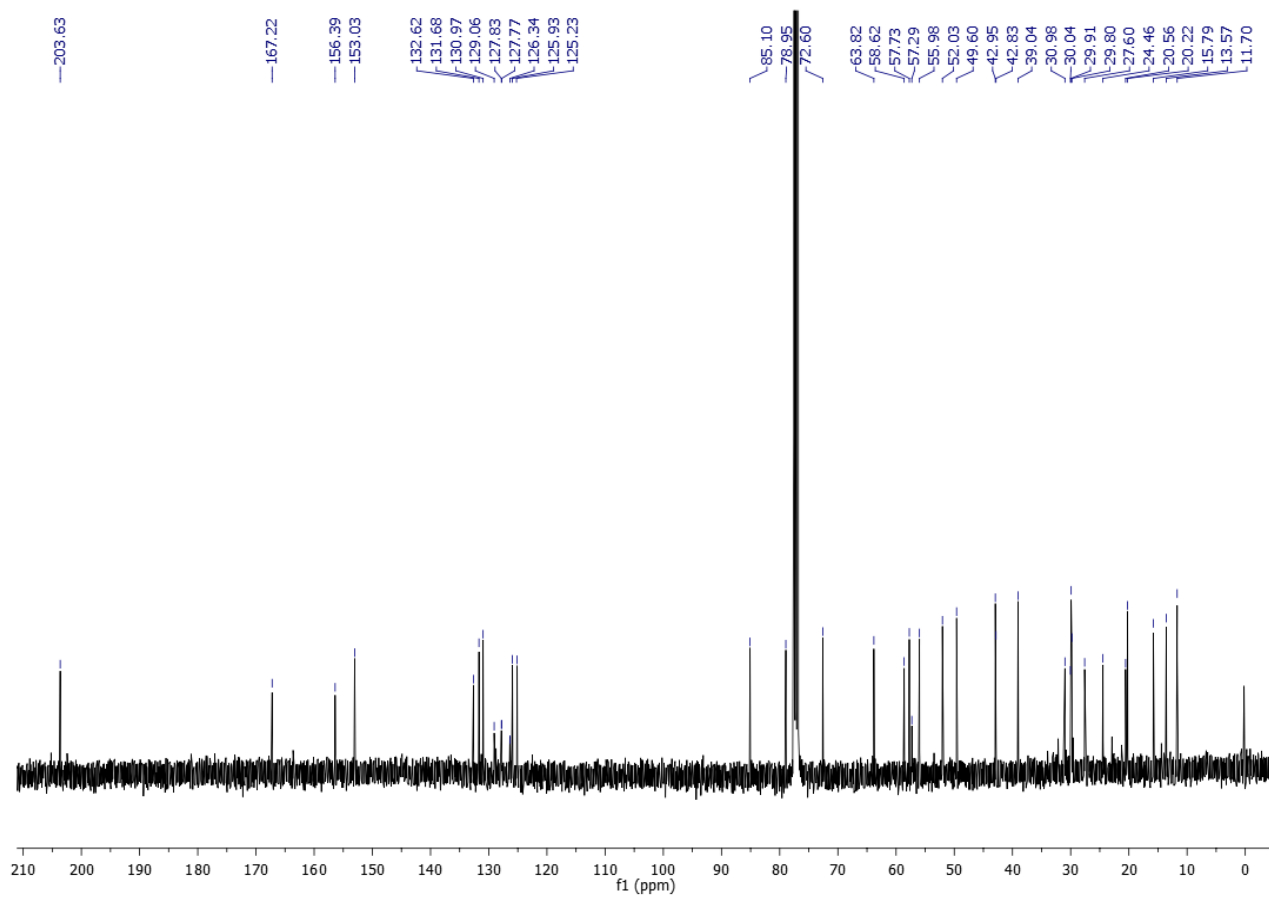

# <sup>1</sup>H NMR of W-9b

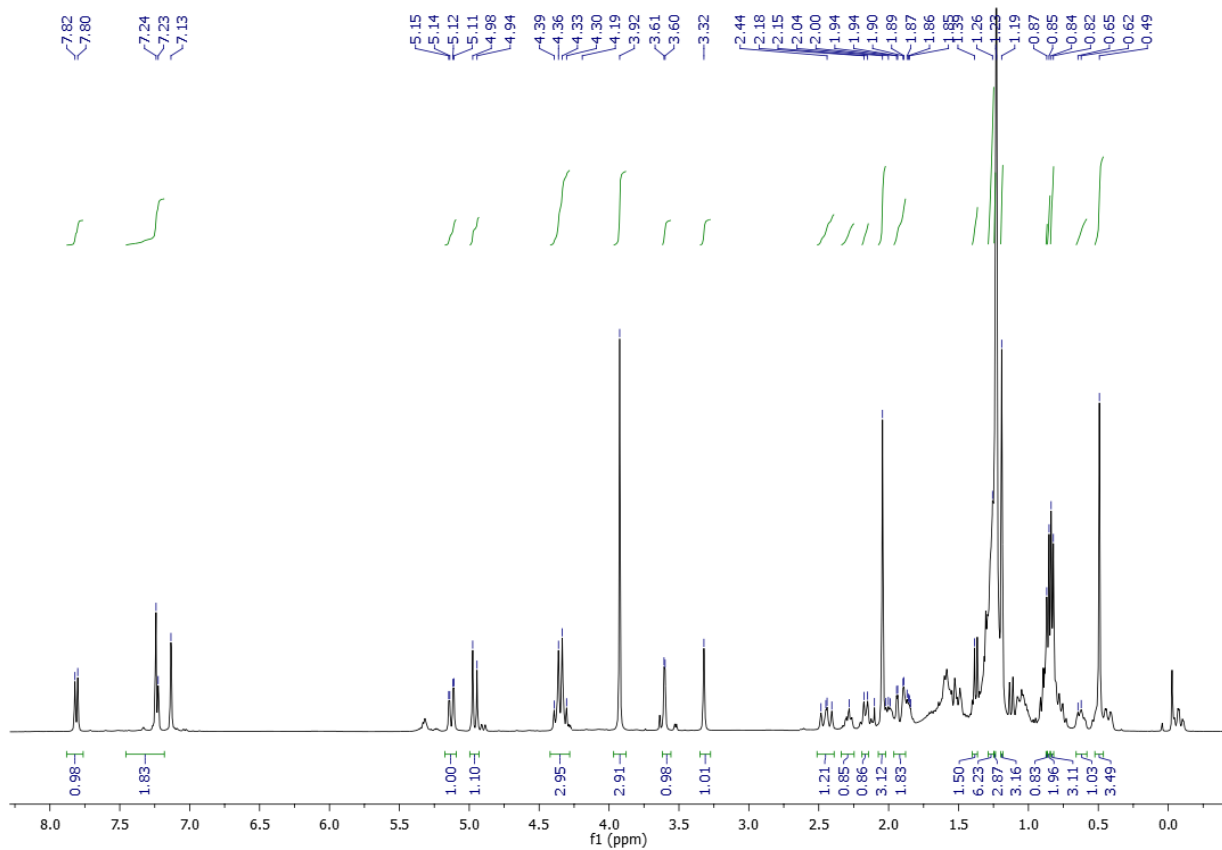

# <sup>13</sup>C NMR of W-9b

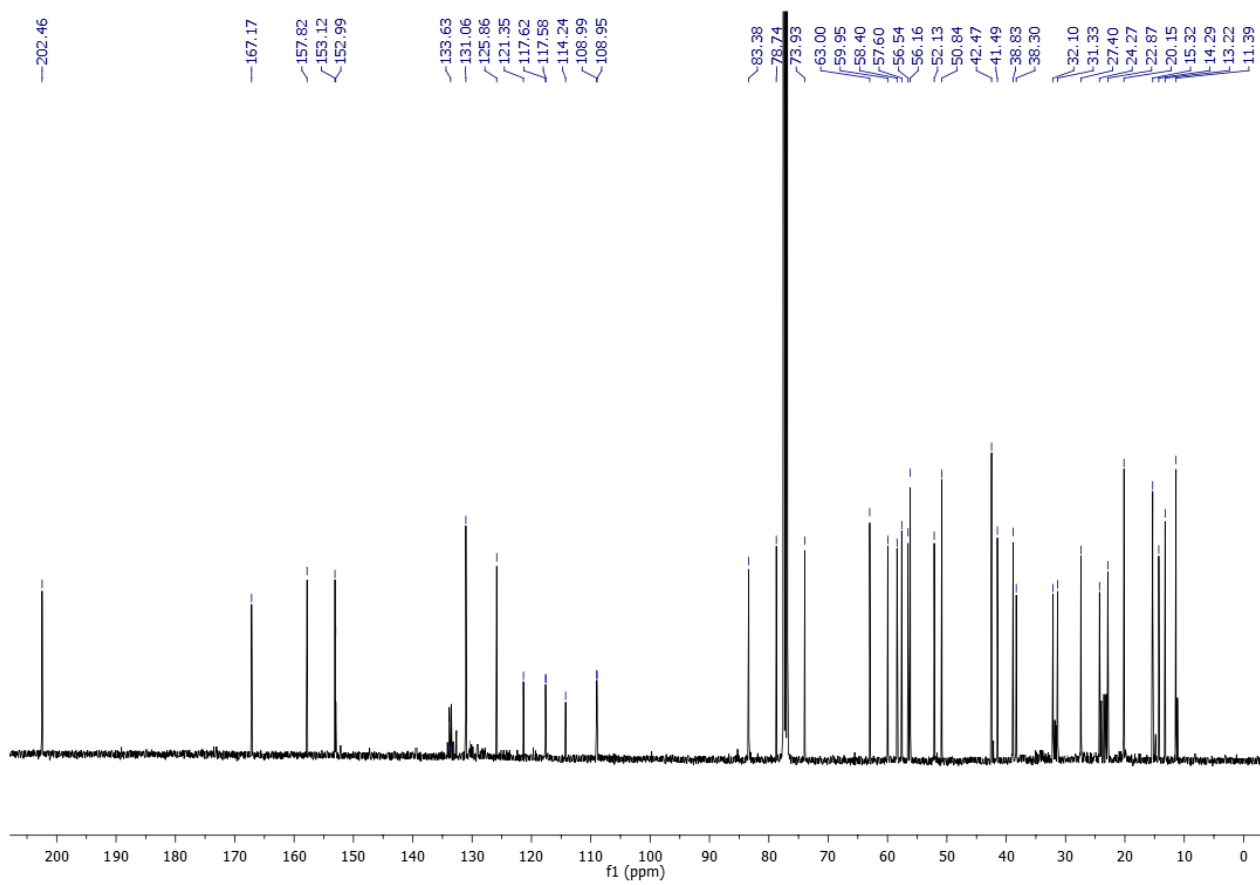

# <sup>1</sup>H NMR of W-10a

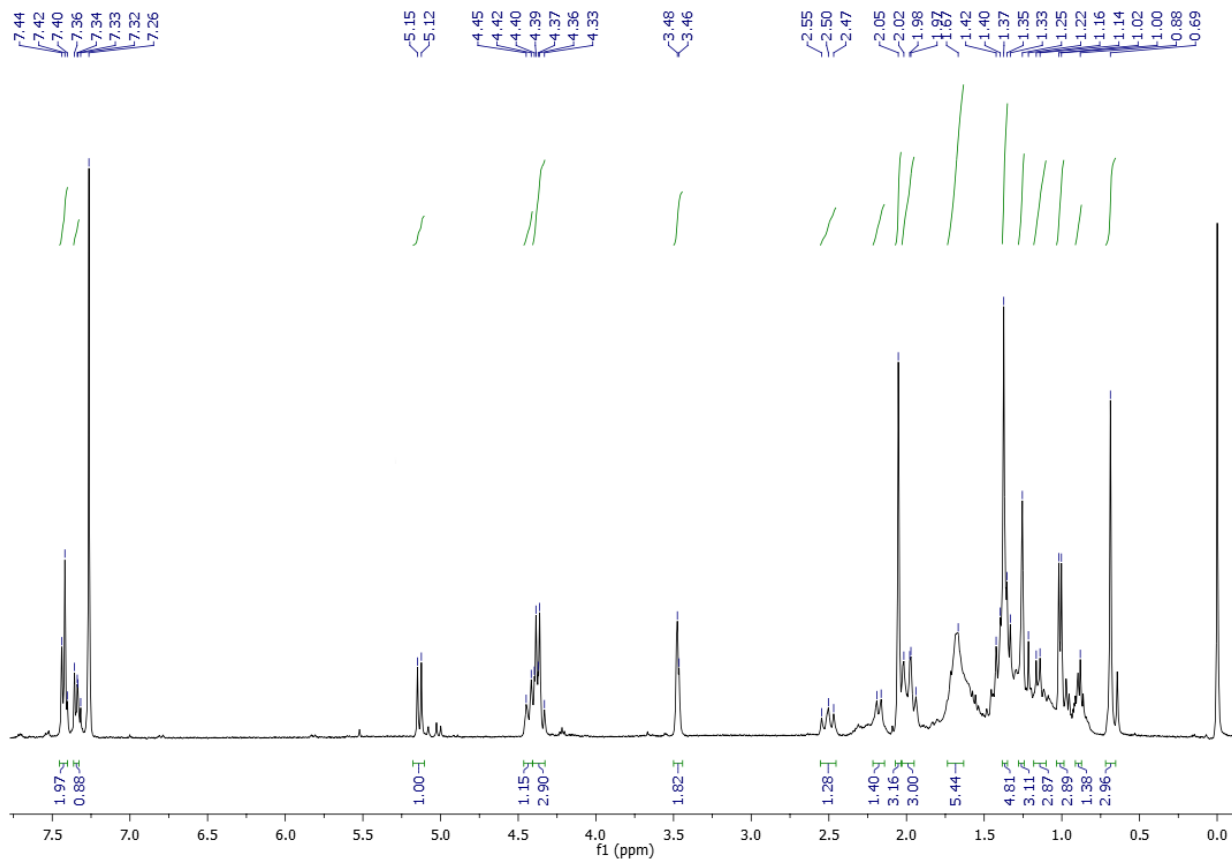

# <sup>13</sup>C NMR of W-10a

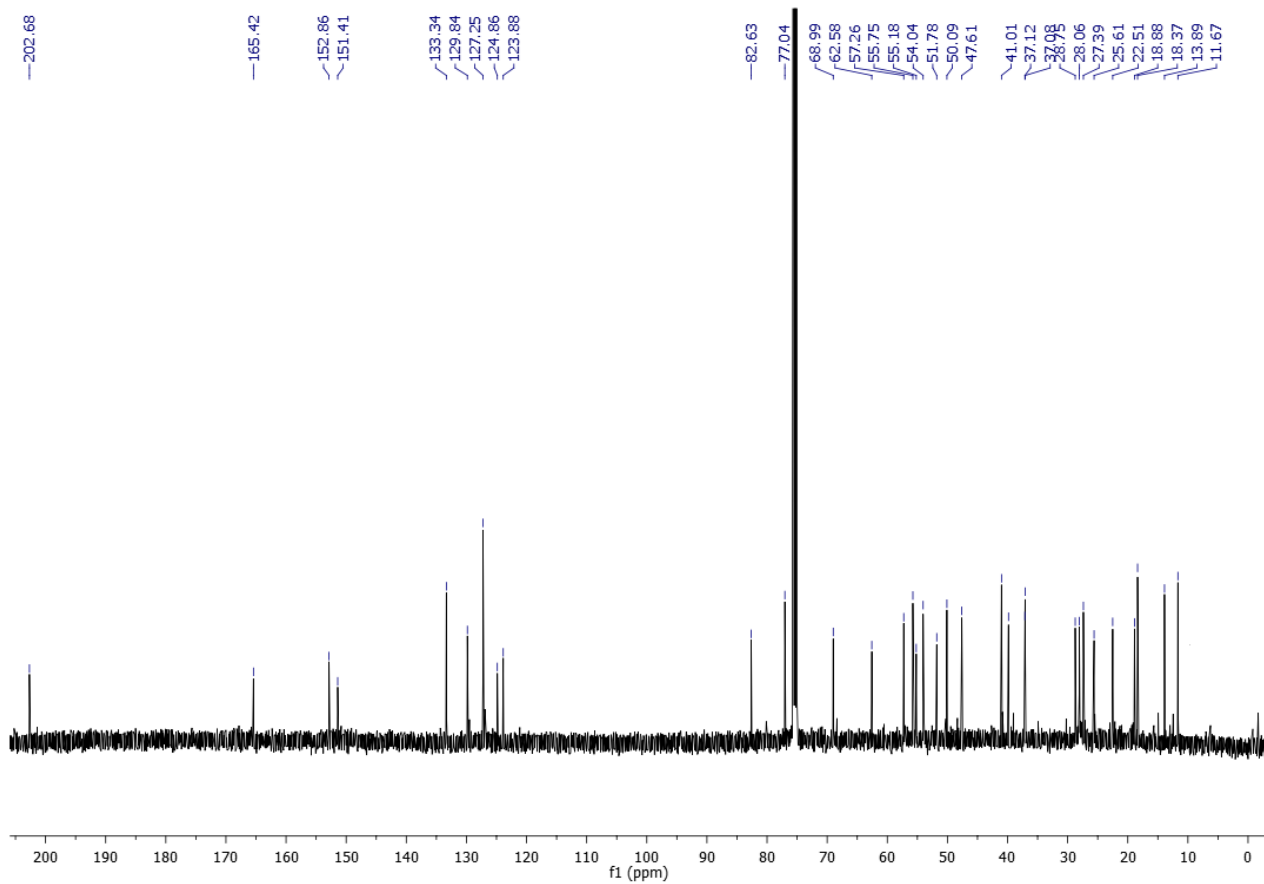

# <sup>1</sup>H NMR of W-11a

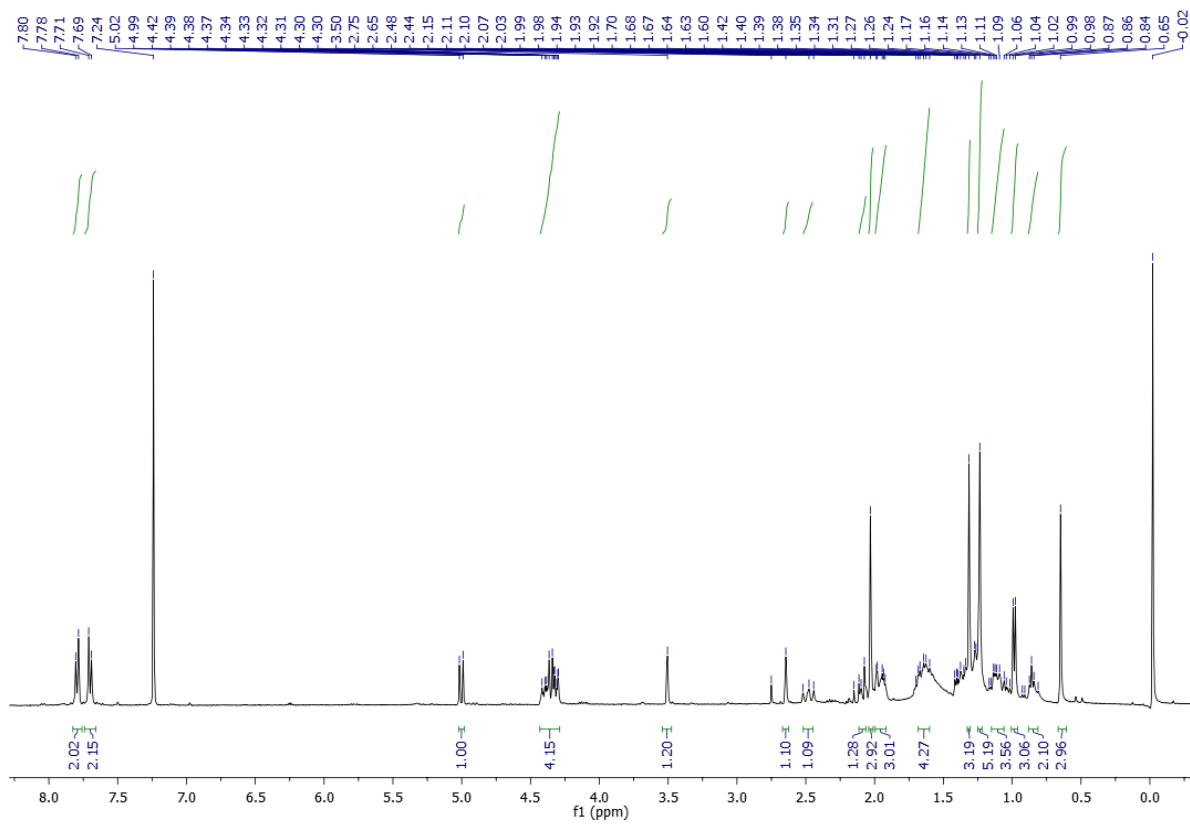

# <sup>13</sup>C NMR of W-11a

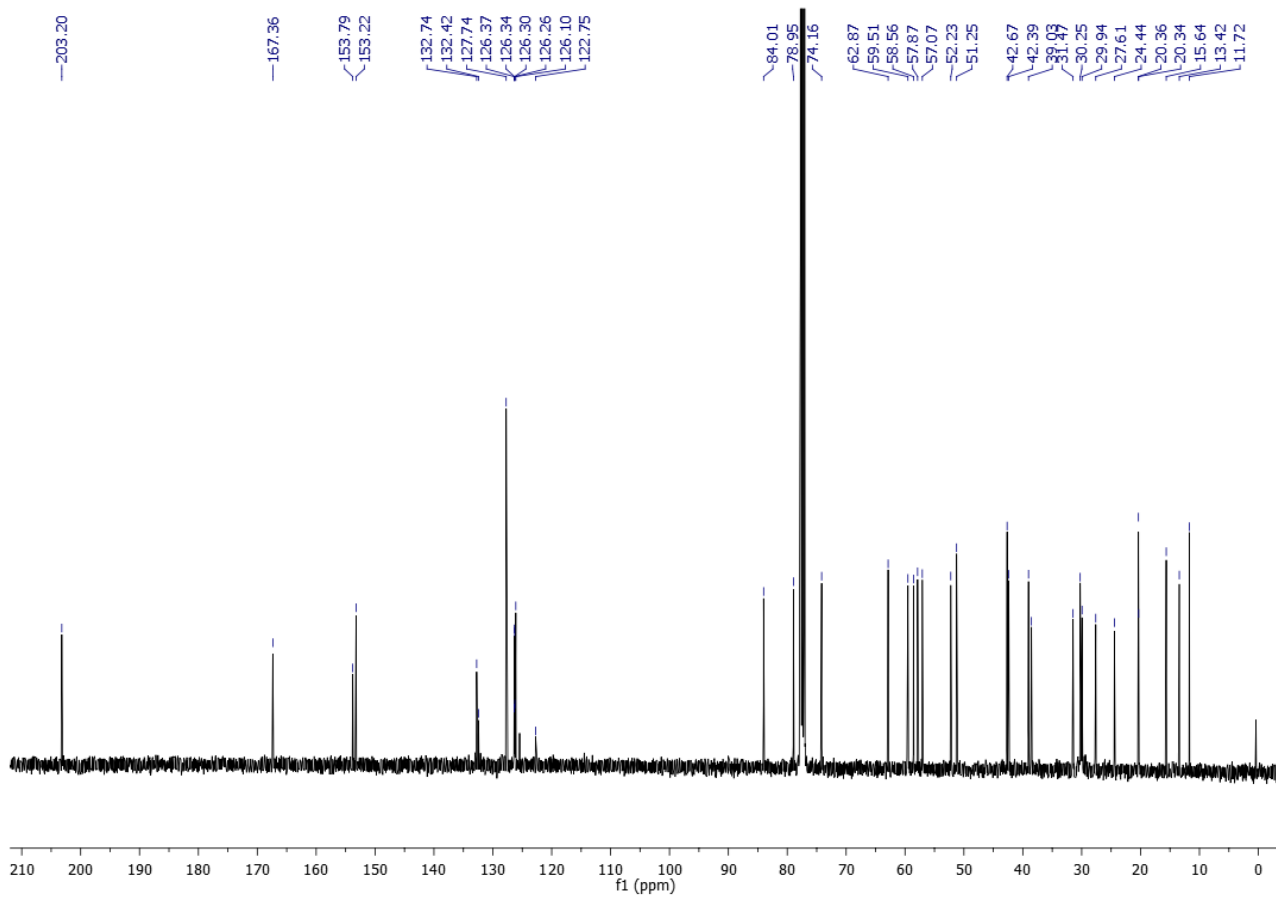

# <sup>1</sup>H NMR of W-11b

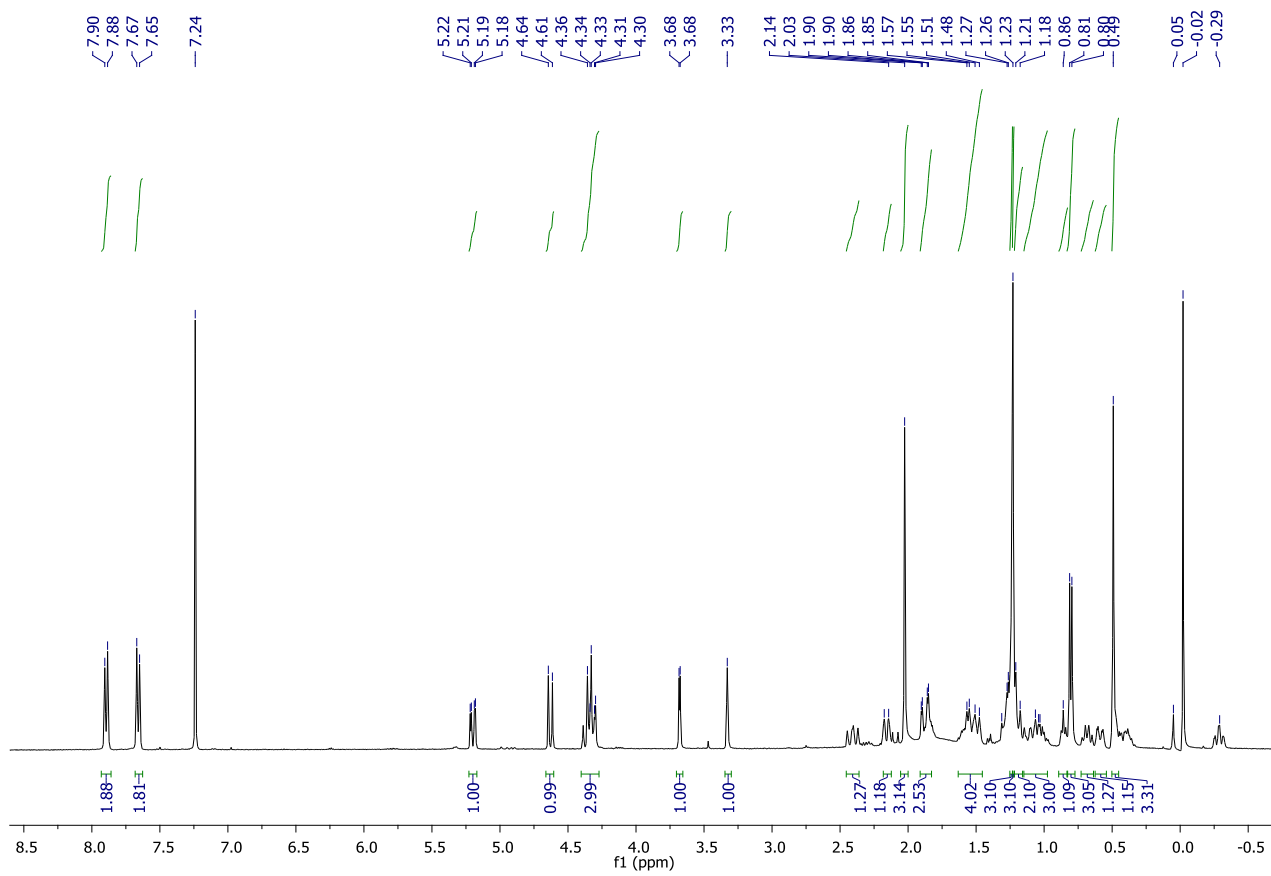



# $^{13}\text{C}$ NMR of W-11b

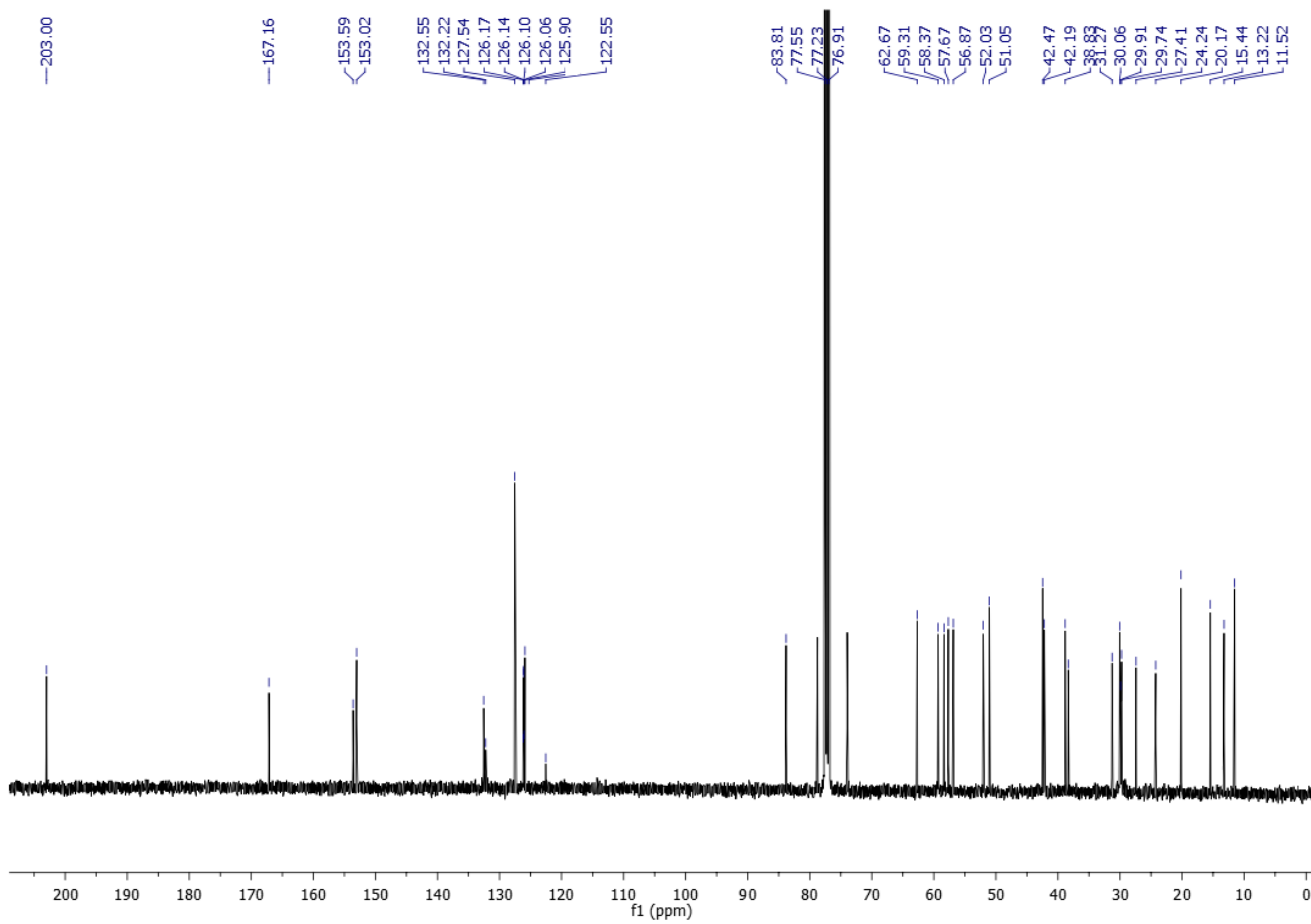

# <sup>1</sup>H NMR of W-12b

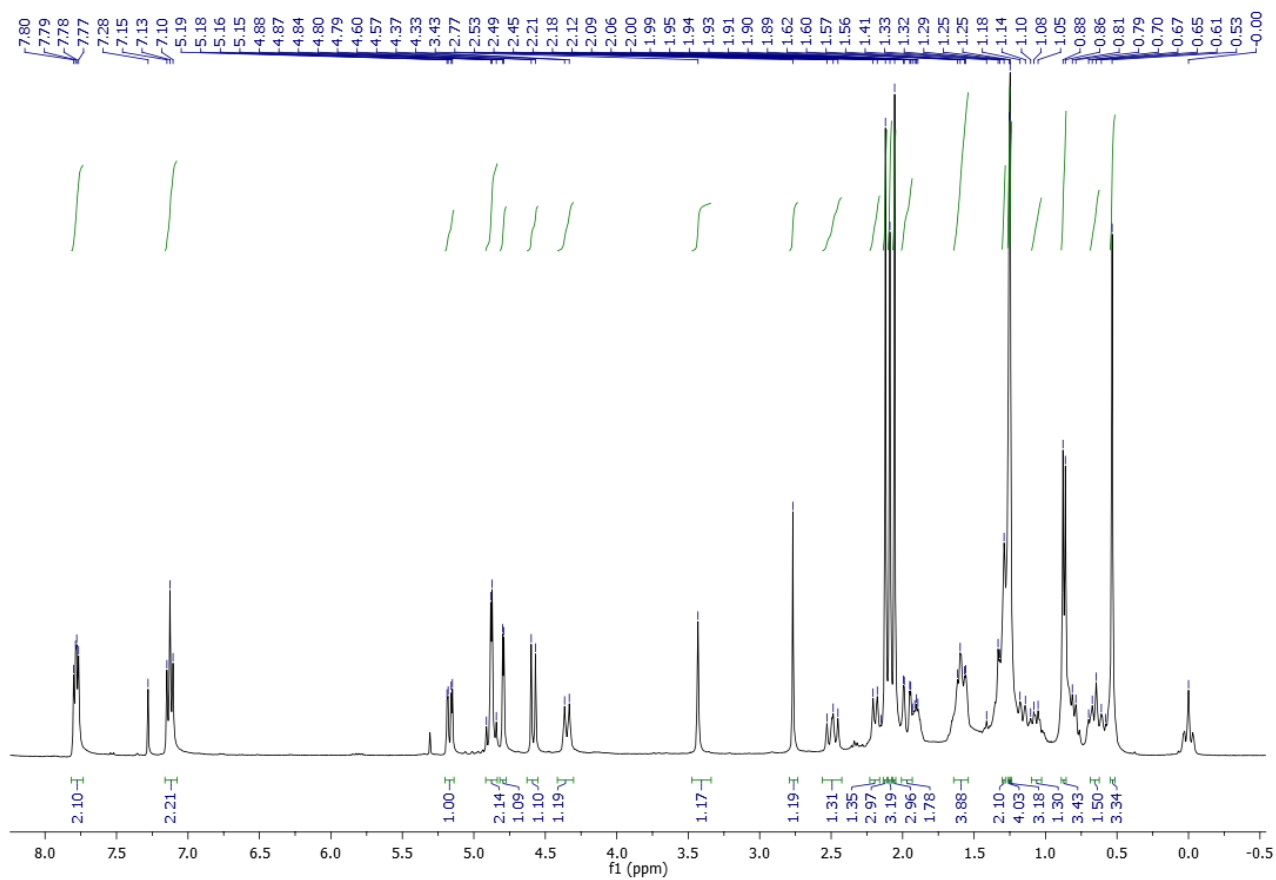

# $^{13}\text{C}$ NMR of W-12b

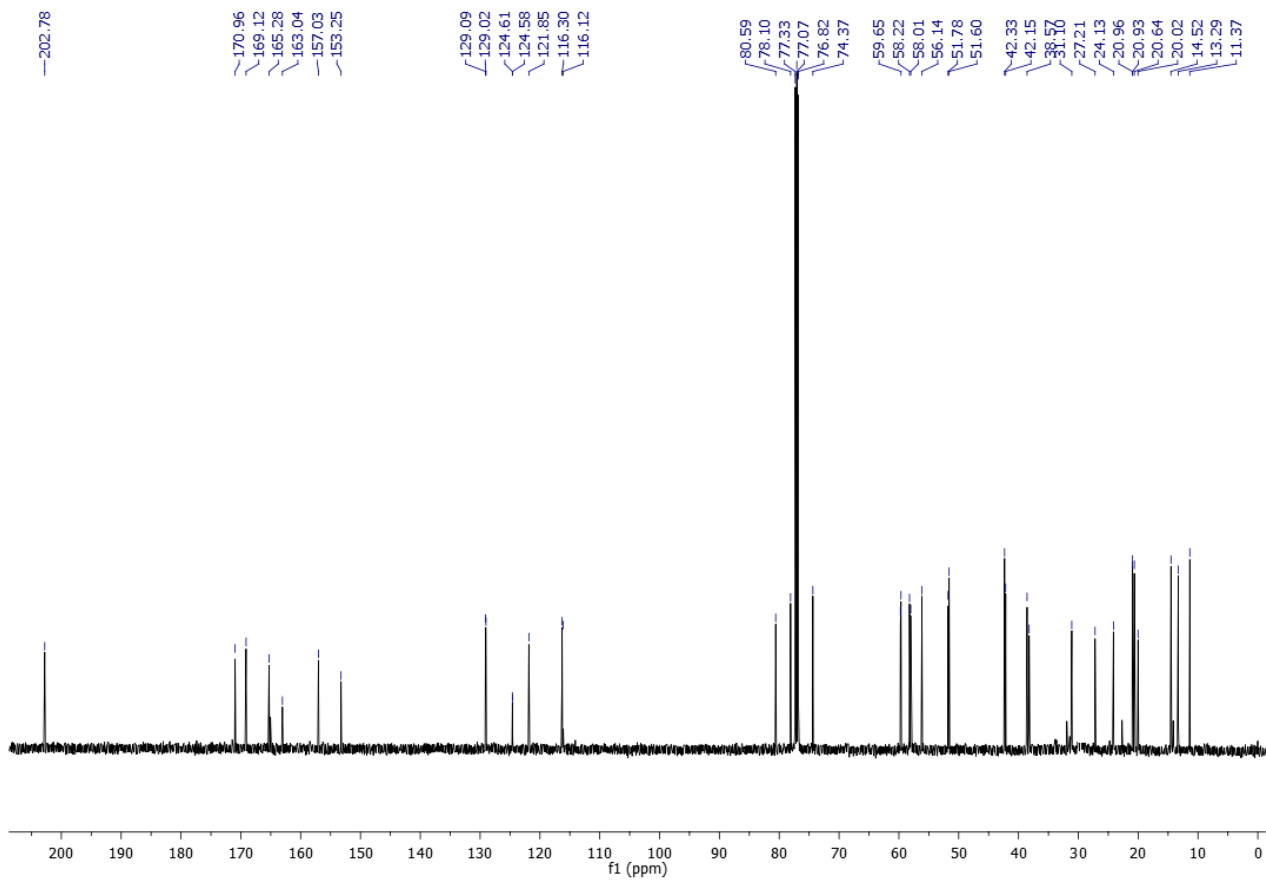

# NOESY OF W-1a

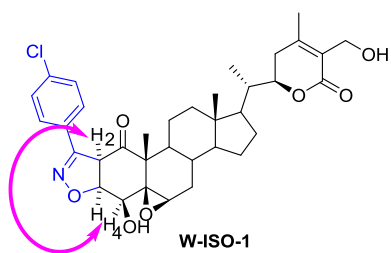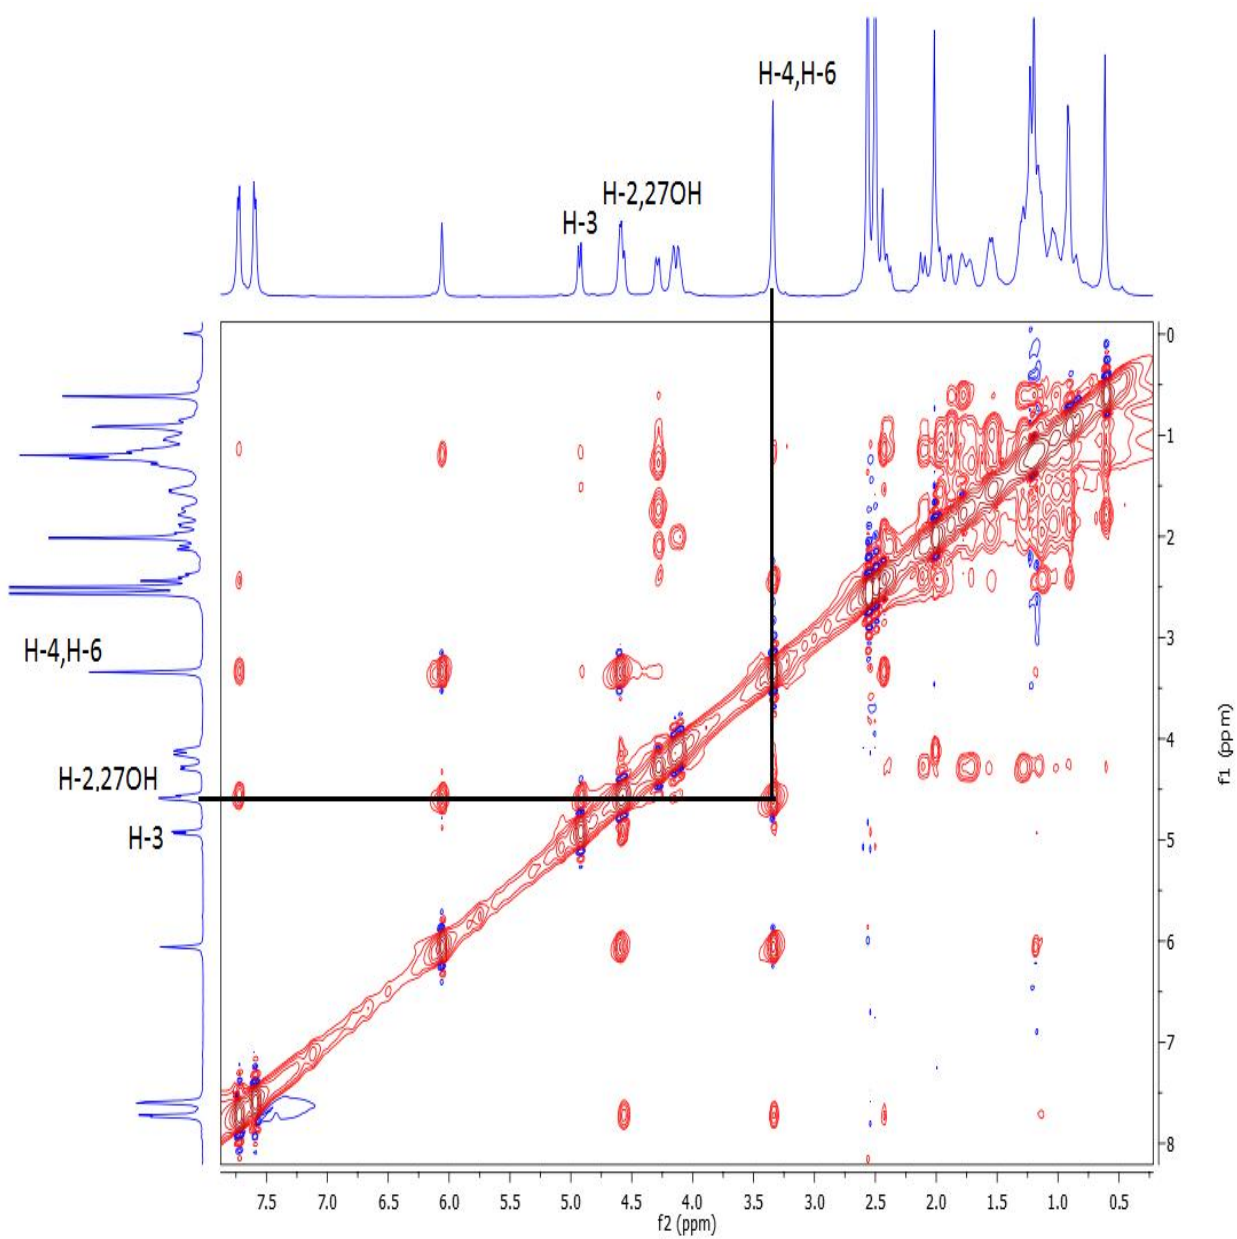

Cosy of W-1a

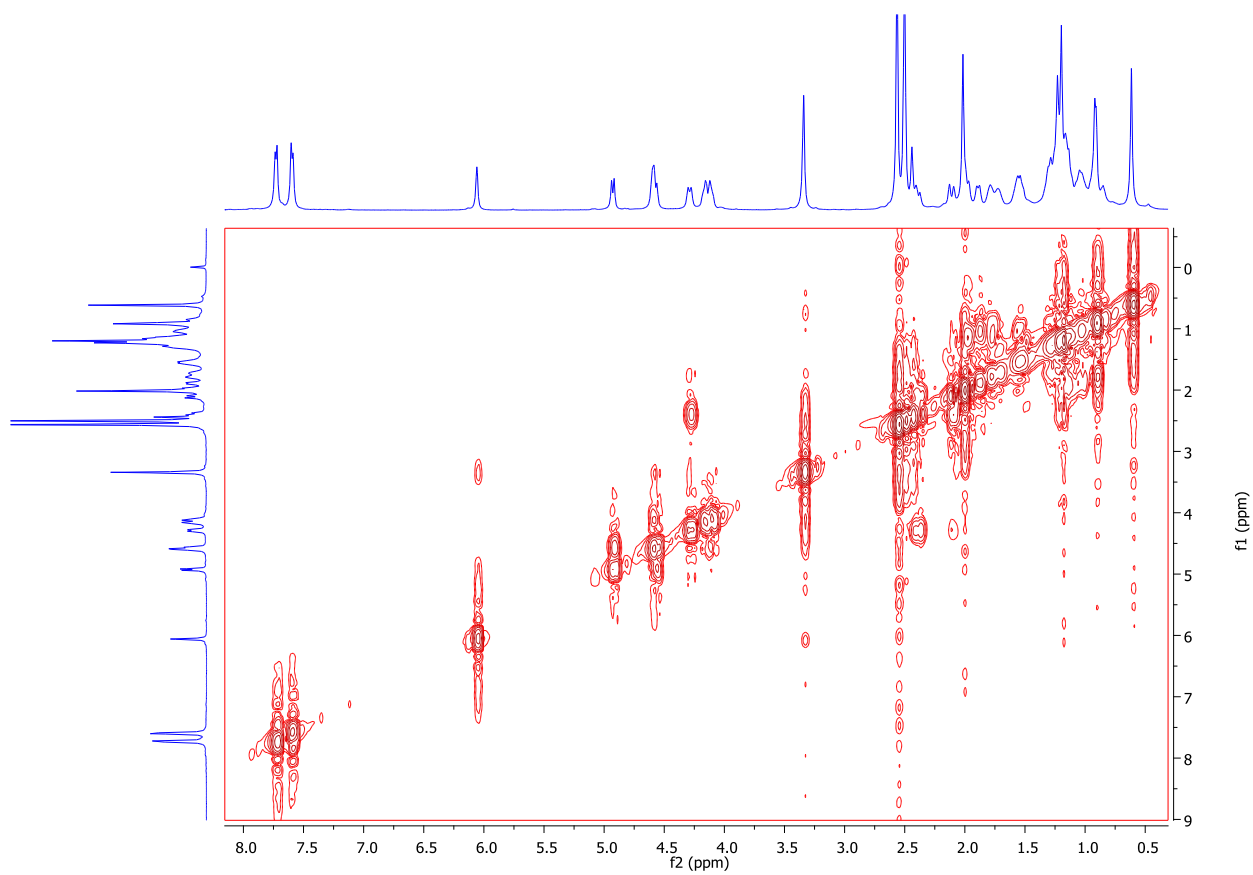

# HMBC of W-1a

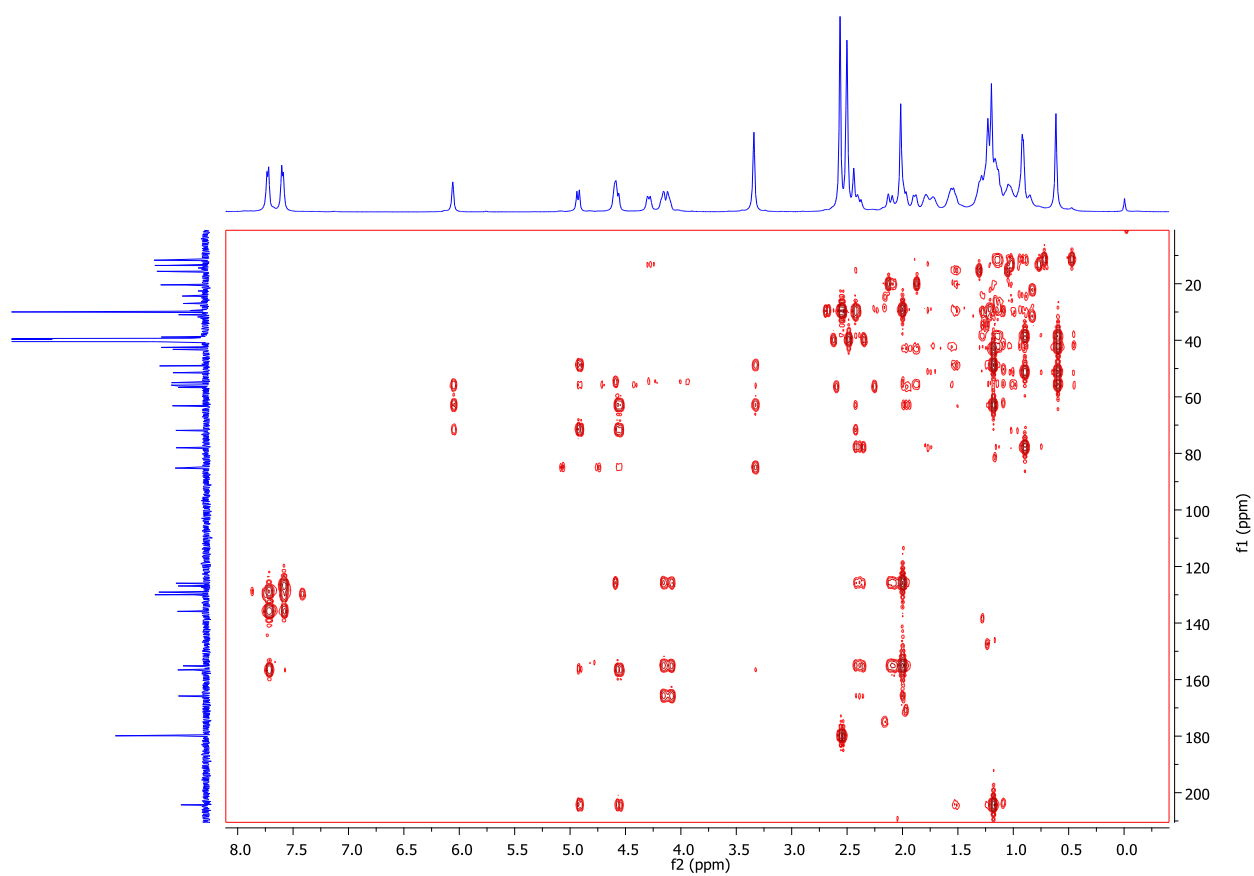

# HSQC of W-1a

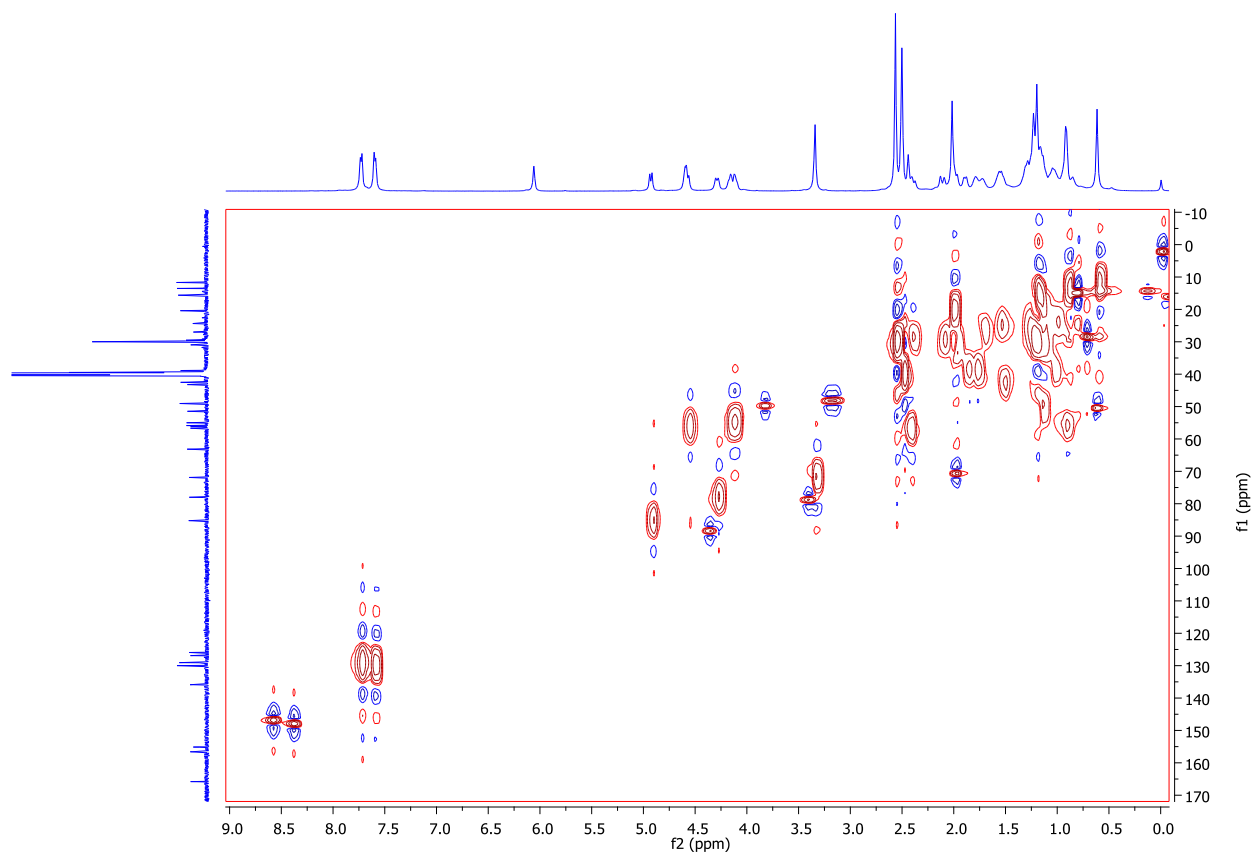





# COSY of W-1b

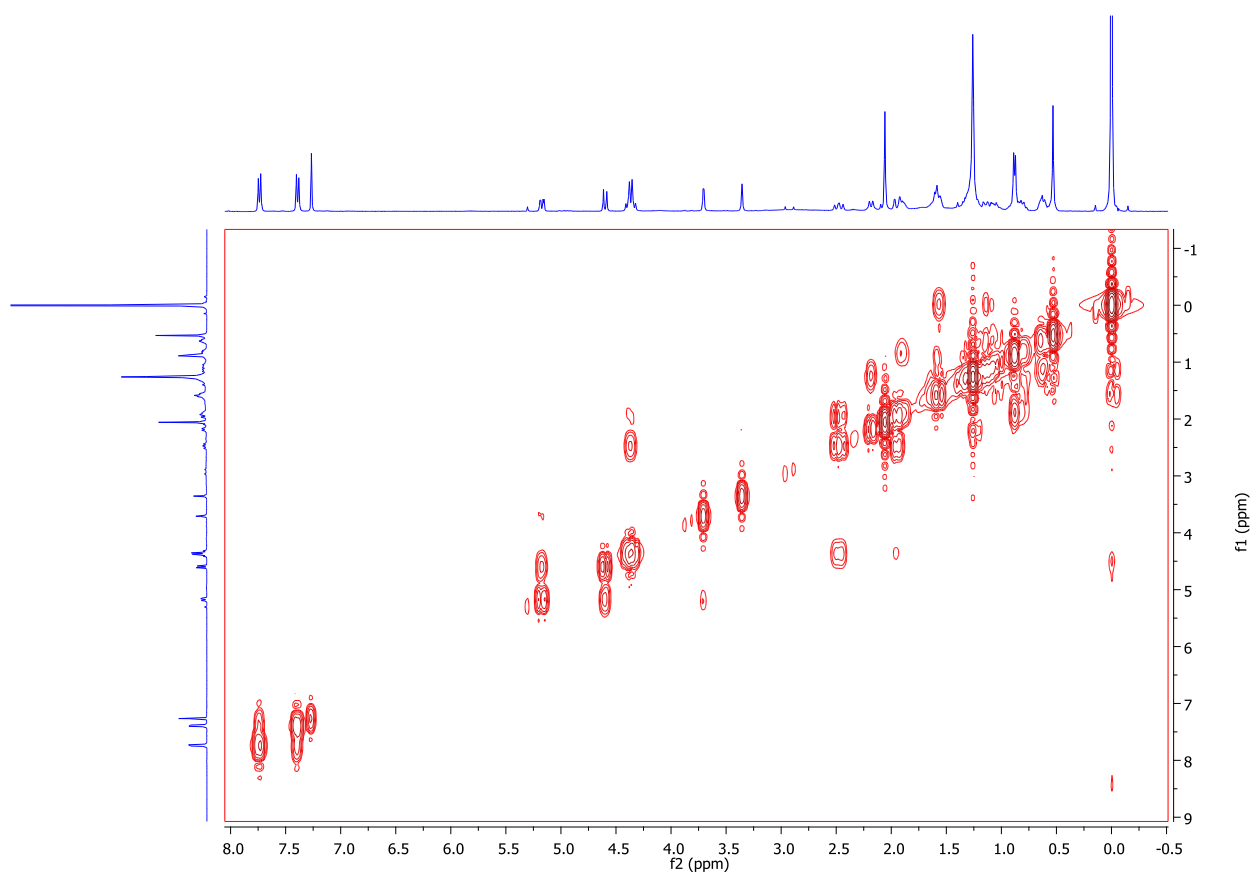

# HSQC of W-1b

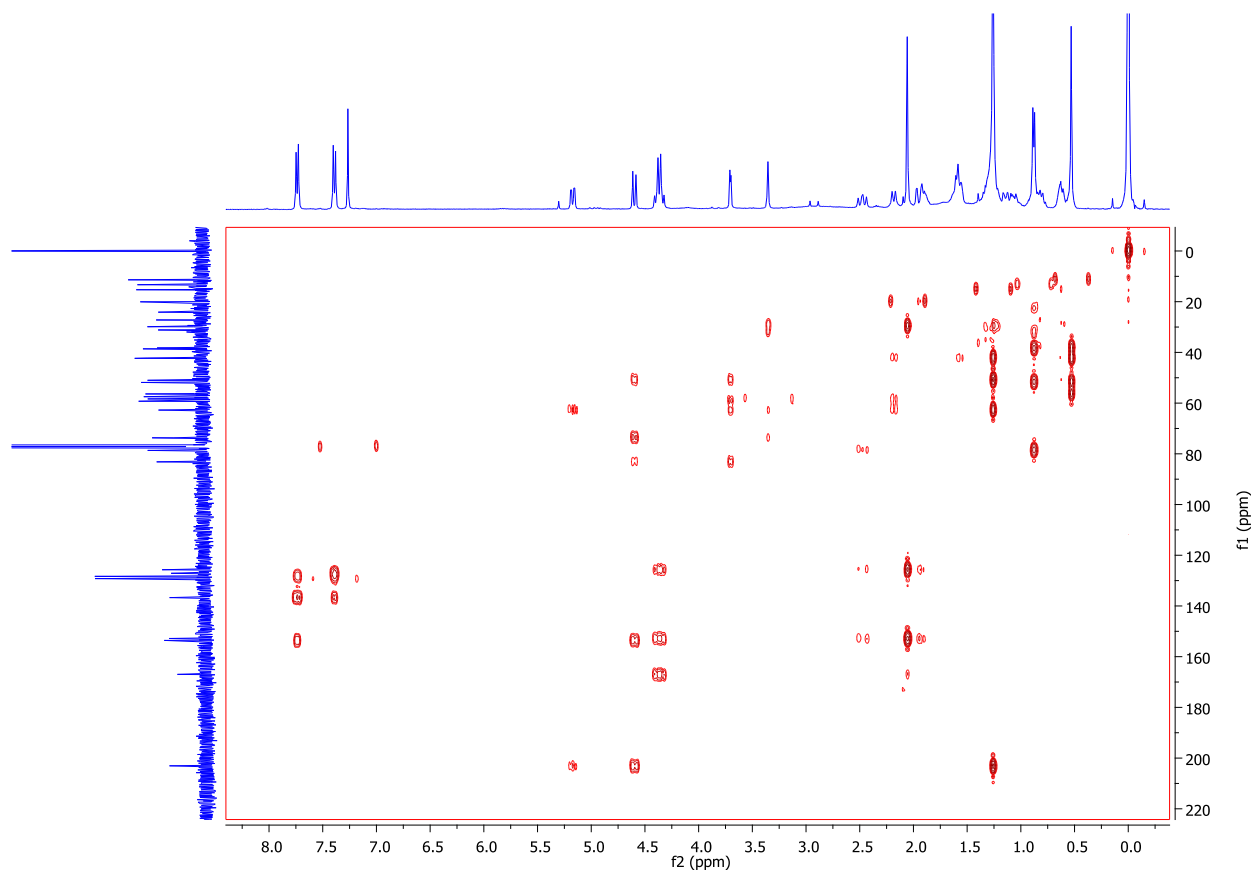

# HMBC of W-1b

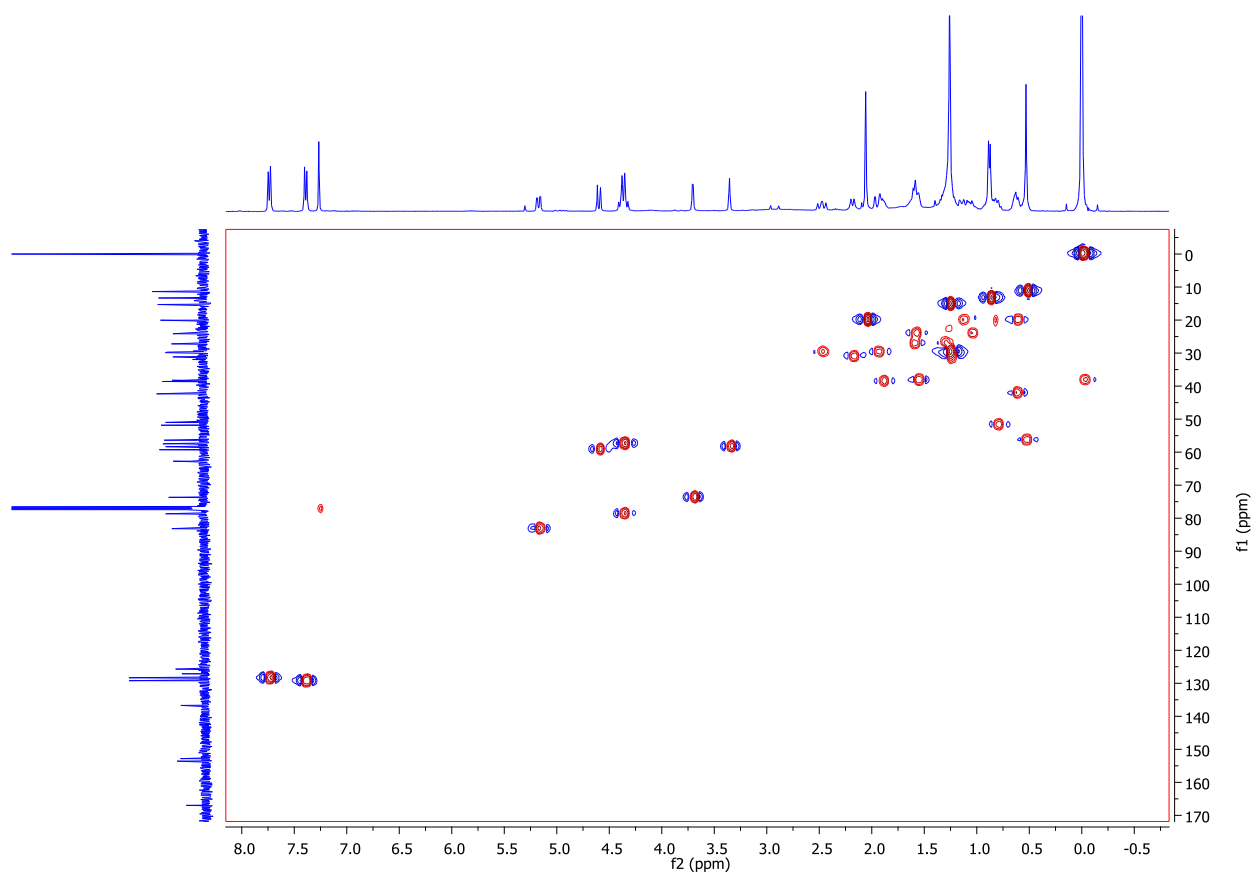

Supplement: 41598_2017_13664_MOESM1_ESM.pdf [file 41598_2017_13664_MOESM1_ESM.pdf]
